1 **Short title:** An Expanded Role for WRINKLED1 Metabolic Control

2 **Corresponding author:**

3 Jorg Schwender

4 Biology Department

5 Brookhaven National Laboratory

6 Upton, NY 11973, USA

7 Phone: (631) 344-3797

8 Fax: (631) 344-3407

9 [schwend@bnl.gov](mailto:schwend@bnl.gov)

10

11 **Article title:** An Expanded Role for WRINKLED1 Metabolic Control Based on Combined Phylogenetic and

12 Biochemical Analyses

13 Cathleen Kuczynski, Sean McCorkle, Jantana Keereetaweeep, John Shanklin, Jorg Schwender

14

15 Cathleen Kuczynski

16 Biology Department

17 Brookhaven National Laboratory

18 Upton, NY 11973, USA

19 [kkuczynski@bnl.gov](mailto:kkuczynski@bnl.gov)

20 ORCID ID: 0000-0002-0625-1017

21 Sean McCorkle

22 Computational Science Initiative

23 Brookhaven National Laboratory

24 Upton, NY 11973, USA

25 [mccorkle@bnl.gov](mailto:mccorkle@bnl.gov)

26 ORCID ID: 0000-0003-1126-4071

27 Jantana Keereetaweeep

28 Biology Department

29 Brookhaven National Laboratory

30 Upton, NY 11973, USA

31 [Keereetaweeep@bnl.gov](mailto:Keereetaweeep@bnl.gov)

32 ORCID ID: 0000-0001-8314-9289

33

34 John Shanklin  
35 Biology Department  
36 Brookhaven National Laboratory  
37 Upton, NY 11973, USA  
38 [shanklin@bnl.gov](mailto:shanklin@bnl.gov)  
39 ORCID ID: 0000-0002-6774-8043

40 Jorg Schwender  
41 Biology Department  
42 Brookhaven National Laboratory  
43 Upton, NY 11973, USA  
44 [schwend@bnl.gov](mailto:schwend@bnl.gov)  
45 ORCID ID: 0000-0003-1350-4171

46

47 **One sentence summary:** A combined comparative genomics and in-vitro DNA binding assay approach was  
48 used to identify conserved binding sites for the WRINKLED1 transcription factor in central metabolism and  
49 lipid biosynthesis.

50 **Footnotes:**

51 **Author contributions:** J.Sc., S.M., C.K., J.K. and J.Sh. conceived the original research plans and designed  
52 the experiments; C.K., S.M. and J.Sc. performed the research and analyzed the data; S.M. and J.Sc.  
53 designed and performed computational analysis; J.Sc. wrote the article with contributions of all authors;  
54 J.Sc. agrees to serve as the author responsible for communication.

55 The author responsible for distribution of materials integral to the findings presented in this article in  
56 accordance with the policy described in the Instructions for Authors ([www.plantphysiol.org](http://www.plantphysiol.org)) is: Jorg  
57 Schwender ([schwend@bnl.gov](mailto:schwend@bnl.gov)).

58 **Funding Information:** This work was supported by the U.S. Department of Energy, Office of Science, Office  
59 of Basic Energy Sciences under contract numbers DE-SC0012704 (to J.Sc.) and KC0304000 (to J.Sh.) -  
60 specifically through the Physical Biosciences program of the Chemical Sciences, Geosciences and  
61 Biosciences Division.

62 **Corresponding author:** [schwend@bnl.gov](mailto:schwend@bnl.gov)

63 **Keywords:** Arabidopsis, *Brassicaceae*, triacyl glycerol, cis-regulatory element, transcription factor  
64 binding motif

65 **Abstract**

66 During triacylglycerol biosynthesis in developing oilseeds of *Arabidopsis thaliana*, fatty acid production is  
67 regulated by the seed-specific transcription factor WRINKLED1 (WRI1). WRI1 is known to directly stimulate  
68 the expression of fatty acid biosynthetic enzymes and a few targets in glycolysis. However, it remains  
69 unclear to what extent and how the conversion of sugars into fatty acid biosynthetic precursors in seeds  
70 is controlled by WRI1. Based on a previously reported DNA binding motif for WRI1, the ASML1/WRI1 (AW)-  
71 box, we developed a comparative genomics approach to search for conserved binding motifs in upstream  
72 regions of *Arabidopsis thaliana* protein-encoding genes and orthologous regions of 11 other Brassicaceae  
73 species. The AW-box was over-represented across orthologs for 915 *Arabidopsis thaliana* genes. Among  
74 these, 73 genes with functions in the biosynthesis of fatty acids and triacylglycerols and in glycolysis were  
75 enriched. For 90 AW-box sequences associated with these target genes, binding affinity to heterologously  
76 expressed *Arabidopsis thaliana* WRI1 protein was determined using Microscale Thermophoresis. Sites  
77 with low dissociation constants are preferentially located close to the transcriptional start site and are  
78 highly conserved between the 12 Brassicaceae species. Most of the associated genes were found to be  
79 co-expressed with WRI1 during seed development. When 46 automatically and manually curated genes  
80 containing conserved AW-sites with high binding affinity are mapped to central metabolism, a conserved  
81 regulatory blueprint emerges that infers concerted control of contiguous pathway sections in fatty acid  
82 biosynthesis and glycolysis. Among unexpectedly identified putative targets of WRI1 are plastidic  
83 fructokinase, phosphoglucose isomerase and several transcription factors.

84

## 85 INTRODUCTION

86 Triacylglycerols (TAG), also known as vegetable oils, are an energy dense resource produced by  
87 many plants and stored in seeds and other plant organs. Plant oils are important for human nutrition as  
88 well as renewable biomaterials and fuels (Chapman and Ohlrogge, 2012). During seed development in  
89 oilseed species such as *Arabidopsis thaliana*, TAG is synthesized and accumulated at high rates (Neuhaus  
90 and Emes, 2000). Within the developing embryo, sugar supplies (sucrose) provided by maternal tissues  
91 are converted by conventional pathways of sugar catabolism into energy cofactors and pyruvate, which  
92 is the carbon precursor for chloroplast localized fatty acid synthesis (FAS) (Ruuska et al., 2002; O'Grady et  
93 al., 2012). WRINKLED1 (WRI1), a transcriptional regulator of the APETALA2/ethylene-responsive element-  
94 binding protein (AP2/EREBP) family has been characterized as a seed-specific transcription factor with  
95 control over FAS during the synthesis of TAG in developing oilseeds (Focks and Benning, 1998; Cernac and  
96 Benning, 2004; Masaki et al., 2005). WRI1 orthologs have been identified and characterized in a variety of  
97 plant species (Kong et al., 2019). Maeo *et al.* (2009) identified a consensus for WRI1 binding sites in  
98 upstream regions of WRI1 target genes, designated ASML1/WRI1 (AW)-box. In several cases, specific DNA  
99 binding by recombinantly expressed WRI1 to AW-box sites has been shown by Electro Mobility Shift  
100 Assays (Maeo et al., 2009; Fukuda et al., 2013; Li et al., 2015). In addition, we recently demonstrated the  
101 use of Microscale Thermophoresis (MST) for *in-vitro* quantification of binding affinity (dissociation  
102 constants) between recombinantly expressed WRI1 and DNA fragments (Liu et al., 2019). The MST  
103 approach gives opportunity to quantitatively characterize the DNA binding affinity of WRI1 in a medium  
104 throughput manner.

105 Since there is good evidence for sucrose synthase, the entry point of sugars, as well as plastidic  
106 pyruvate kinase and subsequent steps of FAS to be under direct control of WRI1 (Baud et al., 2007; Baud  
107 et al., 2009; Maeo et al., 2009), it seems likely that additional enzyme steps in-between sucrose cleavage  
108 and FAS are direct targets of WRI1. Indeed, activities of hexokinase and pyrophosphate dependent  
109 phosphofructokinase (PFK), aldolase, phosphoglycerate mutase and enolase were found to be  
110 substantially reduced in developing seeds of WRI1 KO mutants (Focks and Benning, 1998; Baud and  
111 Graham, 2006), i.e. might also be under direct control of WRI1. Other studies point to plastidic  
112 phosphoglycerate mutase and enolase to be direct targets of WRI1 (Baud et al., 2007; Baud and Lepiniec,  
113 2009). In addition, under conditions where transient overexpression of WRI1 homologs from different  
114 plant species resulted in induced oil accumulation in *Nicotiana benthamiana* leaves (Grimberg et al.,  
115 2015), transcripts of sucrose synthase, PFK, enzyme steps in lower glycolysis between 3-phosphoglyceric

116 acid (3PGA) and pyruvate and of the phosphoenolpyruvate/phosphate translocator of the chloroplast  
117 envelope were found to be upregulated (Grimberg et al., 2015). Altogether, WRI1 is widely understood as  
118 a “master regulator” for the conversion of sucrose to fatty acids in developing seeds and other oil  
119 accumulating tissues (Baud and Lepiniec, 2008; Chapman and Ohlrogge, 2012), but current knowledge on  
120 direct gene targets of WRI1, specifically with regards to the conversion of sucrose to pyruvate, is sparse.  
121 Given that glycolysis, the oxidative pentose phosphate pathway (OPPP) and the Ribulose 1,5-bisphosphate  
122 carboxylase/oxygenase shunt (O'Grady et al., 2012) constitute a ramified network of sugar catabolism in  
123 developing seeds with distinct enzyme isoforms in part being co-localized in the cytosol and the  
124 chloroplast compartments, it is of interest to better resolve which specific sections of sugar catabolism  
125 might be targeted by WRI1.

126           Here we report the results of a genome wide search for conservation of the AW-box in 12 species  
127 of the mustard family (Brassicaceae), including *A. thaliana* as the reference organism. Among *A. thaliana*  
128 genes for which the AW-box was over-represented across orthologous upstream regions (OURs), genes  
129 of glycolysis, FAS, TAG biosynthesis as well as transcription factors related to oil synthesis were found to  
130 be significantly enriched. Experimental validation of these targets by determination of *in-vitro* DNA  
131 binding activity to WRI1 protein and analysis of conservation of these sites across species reveals a  
132 conserved metabolic blueprint, giving insight on how WRI1 orchestrates central metabolism during seed  
133 oil biosynthesis.

134

135

## 136 RESULTS

### 137 The AW-box is enriched in -1 to 500 bp upstream regions among fatty acid biosynthetic genes in *A.*

#### 138 *thaliana*

139 Maeo *et al.* (2009) reported the AW-box (5'-CNTNG(N)<sub>7</sub>CG-3'; N = A, T, C or G) to be present in  
140 promoter regions upstream the ATG start codon and close to the transcriptional start site (TSS) in 19 out  
141 of 46 searched FAS genes. This suggests that the AW-box is statistically enriched in upstream regions of  
142 genes of the FAS pathway. We therefore quantitatively evaluated the presence of the AW-box in *A.*  
143 *thaliana* gene models for the set of 52 *Arabidopsis* genes annotated by the ARALIP database to be involved  
144 in FAS (annotation 'Fatty Acid Synthesis') (Li-Beisson *et al.*, 2013) relative to the genomic background  
145 (Table 1). AW-box pattern matches were collected within five different search windows of 500 bp size,  
146 defined relative to the position of the start codon as well as the stop codon of each gene model (Table 1).  
147 Any number of pattern matches per searched sequence was counted as a hit. For each of the searched  
148 genomic regions, the mean expectation value of hits per 52 sampled genes can be derived from the  
149 genome wide frequency of hits (Table 1). For the region -1 to -500 bp upstream ATG, 10.5 hits are expected  
150 per 52 sampled genes (Table 1), which is very similar to the expectation values of randomized controls  
151 (Table 1), confirming that the genome wide frequency of AW-box hits is according to random chance  
152 expectation (Table 1). In contrast to the mean expectation of 10.5 hits, 30 hits were found for the -1 to -  
153 500 bp upstream region of the 52 FAS genes, which means the AW-box is substantially enriched above  
154 the genomic background (hypergeometric *p*-value  $3 \times 10^{-9}$ , Table 1). For the other genomic regions that  
155 were probed, the number of hits for sampling the 52 FAS genes was always very close to the mean  
156 expectation number, *i.e.* the AW-box was not over-represented relative to the background expectation  
157 (Table 1). Since for the -1 to -500 bp upstream region the mean expectation (10.5) amounts to 35 % of the  
158 detected number of hits (30), a substantial fraction of the 30 observed hits could be false positive. Given  
159 this level of anticipated spurious AW-box hits we supposed that identification of WRI1 targets could  
160 benefit from a phylogenetic footprinting approach as well as from testing individual binding sites in a  
161 medium throughput fashion by a quantitative *in-vitro* DNA binding assay for *At*WRI1 (Liu *et al.*, 2019). Fig.  
162 1 summarizes a workflow developed in this study which lead to the identification of numerous highly  
163 conserved AW-sites with *in-vitro* binding affinity to WRI1 protein, and therefore identifies likely WRI1  
164 genes targets in *A. thaliana*, mostly within central metabolism.

### 165 Synteny analysis across 12 *Brassicaceae* genomes

166 To allow testing for enrichment of the AW-box across orthologous promoter regions, genomic  
167 information for 12 species within the Brassicaceae family was collected from public available sources,  
168 including *A. thaliana*, which was designated as the annotated reference organism (Table 2). To define sets  
169 of syntenic ortholog genes we first compared the *A. thaliana* genome to each of the other genomes in a  
170 pair-wise fashion by using the SynOrths tool (Cheng et al., 2012). For all species between 70 and 94 % of  
171 the protein encoding gene content was found in ortholog gene sets (Table 2), which is similar to the 68 to  
172 92 % of *A. thaliana* gene orthologs reported for *Brassicaceae* genomes (Haudry et al., 2013) and confirms  
173 that *Brassicaceae* genomes tend to be highly syntenic. All pairwise orthology relations were further  
174 aggregated into 25545 sets of orthologous genes (Supplemental Fig. S1). Each ortholog gene set is  
175 identified by the *A. thaliana* gene locus within the set.

176 **The AW-box is significantly enriched across orthologous upstream regions of 915 *A. thaliana* genes**  
177 **and particularly for many genes of glycolysis and lipid biosynthesis**

178 Next, the AW-box pattern was searched for in all 12 *Brassicaceae* species in 543076 genomic  
179 regions between -1 and -500 bp upstream the translational start of protein encoding genes (Table 2).  
180 Across all 12 searched genomes the AW-box was present for in-between 19.5 and 23 % of upstream  
181 sequences, which is similar to the frequency of 20.2 % that derives from the gene counts in *A. thaliana*  
182 (Table 2). In assuming that true functional AW-box sites tend to be conserved across species, over-  
183 representation of AW-box hits among orthologous upstream regions (OURs) was tested for based on the  
184 cumulative hypergeometric probability function (Methods). The False Discovery Rate (FDR) was estimated  
185 based on re-determination of the hypergeometric *p*-values if the pattern search was repeated with  
186 random shuffled upstream sequences (Supplemental Fig. S2A). For a *p*-value threshold of  $3.02 \times 10^{-4}$  the  
187 empirical FDR was limited to 5 %. In this case 915 ortholog gene sets were judged to be significantly  
188 enriched with the AW box (Supplemental Fig. S2A). Accordingly, for 915 associated *A. thaliana* genes the  
189 AW-box is likely conserved, which is 6 times fewer than the 5540 AW-box hits that are obtained if only *A.*  
190 *thaliana* upstream regions are searched (Table 1). This indicates that the enrichment analysis can  
191 discriminate between conserved AW-box sites and spurious ones. Exploration of sequence alignments  
192 among AW-sites identified in the 915 ortholog gene sets revealed a substantial degree of conservation  
193 (Supplemental Fig. S3C-E). However, it is unclear if one can expect that the majority of the 915 discovered  
194 ortholog gene sets identify true functional WRI1 binding sites. We concluded that this is unlikely to be the  
195 case since repeating the AW-box enrichment analysis with base substitutions and permutations of the  
196 AW-box search pattern consistently resulted in close to 790 significance calls (Supplemental Fig. S2B).

197 The 915 *A. thaliana* gene identifiers for which the AW-box was found to be enriched across OURS  
198 were subjected to Gene Ontology (GO) term and pathway analysis (Table 3). Genes related to fatty acid,  
199 TAG and lipid synthesis were found to be significantly over-represented for all four classification systems  
200 tested (Table 3). The highest enrichment (12.9-fold) was found for category “Fatty Acid Synthesis” of the  
201 lipid pathways classification system ARALIP (Li-Beisson et al., 2013)(Table 3), the same gene set already  
202 considered for detection of the AW-box in the *A. thaliana* upstream region (Table 1). Also, 9 genes of  
203 ARALIP category “Triacylglycerol Biosynthesis” were identified (Table 3), which includes genes encoding  
204 enzyme functions in TAG biosynthesis as well as genes encoding for transcription factors. Furthermore,  
205 genes associated to glycolysis were significantly enriched in all classification systems except for ARALIP,  
206 which encompasses only lipid pathways (Table 3). Overall, over-representation of the AW-box was  
207 consistently found to be associated to lipid metabolism and glycolysis. The intersection of all enrichment  
208 gene sets in Table 3 identifies 73 *A. thaliana* gene loci. We postulated that a high proportion of these are  
209 direct WRI1 targets, which warrants detailed testing of binding specificity to WRI1 protein.

#### 210 ***in-vitro* binding assays of AW-box sequences from putative WRI1 target genes allow classification into** 211 **binding and non-binding sites**

212 The pathway and GO term enrichment analysis of Table 3 identified 73 *A. thaliana* genes. Within  
213 the 500 bp upstream region of these, because individual genes can have several AW boxes in this region,  
214 95 AW-box sites are identified and for all of them binding affinities to recombinantly expressed AtWRI1  
215 were determined based on MST (see methods). Since a few of the AW-box sites overlap, the 95 AW-boxes  
216 are represented by altogether 90 synthesized DNA fragments of 28 bp length for which dissociation  
217 constants ( $k_d$ ) were determined (Supplemental Table S4, measurements 1-86; 189-192). Fig. 2 shows that  
218 the resulting 90  $k_d$  values approximate a bimodal distribution which peaks for values close to 0 nM and  
219 for dissociation constants above 1000 nM which are grouped with non-binding DNA fragments. Taking  
220 advantage of the distinct bimodality of the distribution, DNA fragments were classified into specific  
221 binding and non-binding ones based on a threshold value of 200 nM, which designates the left peak to  
222 represent specific binding AW-sites (Fig. 2). While the choice of this specific threshold value is somewhat  
223 arbitrary, the exact value is not critical for our further analysis since the two maxima are clearly separated  
224 with only 9  $k_d$  values (10 % of the 90 values) spread between 200 and 1000 nM (Fig. 2). The 62 AW-box  
225 sites associated to specific binding DNA fragments ( $K_d < 200$  nM) have substantial overall sequence  
226 similarity that exceeds the five fully conserved bases of the AW-box pattern (Fig. 2, sequence logo  $K_d <$   
227 200 nM). Notably, while the AW-box consensus originally was defined to be 14 nucleotide (nc) long  
228 (sequence logos in Fig. 2, positions 3 to 16), two nc positions outside the AW-box seem to be conserved



229 among *in-vitro* WRI1 binding AW-sites (positions 17, 18). In contrast to the specific binding AW sites of  
230 the left peak of Fig. 2, no consensus beyond the 5 invariable bases of the AW-box is detectable for the 33  
231 remaining sites of lower binding affinity (Fig. 2), suggesting that these instances are spurious pattern  
232 matches. To clearly demonstrate that the AW-box consensus alone does not reliably identify WRI1 binding  
233 sequences, we synthesized 10 additional 28 bp sized DNA fragments, the sequences of which were  
234 sampled from a pseudo-randomized DNA sequence background (33% G+C content), searching for an  
235 extended 28 nc AW-box pattern 5'-(N)<sub>7</sub>CNTNG(N)<sub>7</sub>CG(N)<sub>7</sub>-3'. In MST binding assays, only two  $k_d$  values  
236 were just below 200 nM (150 nM, 185 nM), while 5 of the DNA fragments were judged to be non-binding  
237 (Supplemental Table S4, measurements 157-166).

### 238 **AW-boxes that bind WRI1 tend to be phylogenetically conserved**

239 For this study we defined *A. thaliana* as the reference species and sequence conservation was  
240 assessed by pairwise comparisons between *A. thaliana* AW-sites and sites of other species, with a  
241 stringent similarity cutoff (see methods). Pairwise conservation relations were aggregated to the gene  
242 and species level as demonstrated in Supplemental Fig. S3B. As an example, two AW-box sites positioned  
243 at -120 and -148 bp upstream the start codon of *A. thaliana* plastidic pyruvate kinase  $\beta_1$ -subunit (*AtPK<sub>p</sub> $\beta_1$* )  
244 are shown in Fig. 3A. Both sites bind WRI1 *in-vitro* (Maeo et al., 2009)(Supplemental Table S4) and *in-vivo*  
245 functionality to drive WRI1 dependent gene expression has been thoroughly characterized for both sites  
246 (Maeo et al., 2009). The two AW-sites are conserved among 19 out of 22 OURs and among all of the 12  
247 species of this study (Fig. 3A). Genes that miss a conserved site are PK<sub>p</sub> isoforms in polyploid species (Fig.  
248 3A). For both *AtPK<sub>p</sub> $\beta_1$*  AW-sites, sequence logos show full conservation at 13 base positions in all aligned  
249 sequences (Fig. 3B). To test if other AW-sites are similarly well conserved, the conservation analysis of Fig.  
250 3A was applied to all AW-sites discovered in Fig. 2 by *in-vitro* binding assays (Supplemental Table S5). From  
251 the 73 *A. thaliana* genes with upstream AW-sites examined, 53 have at least one site classified to bind  
252 WRI1 specifically. Conservation was assessed by tracking only sites with specific binding activity ( $k_d < 200$   
253 nM) and expressed as species conservation ratio, which is the number of species in which an *in-vitro*  
254 binding AW-site is conserved divided by 12 (total number of species). In result, in 79% of cases (42) the  
255 species conservation ratio is  $\geq 0.8$  (Fig. 3C). Many cases where the value of the species conservation ratio  
256 is below one can be explained by missing orthologs or the ortholog gene discovery process having missed  
257 to detect an ortholog in a species.

258 If *A. thaliana* AW-box sites that are conserved and specifically bind WRI1 *in-vitro* are true  
259 functional sites, then one should expect that WRI1 binding affinity is also well preserved, i.e. that variation

260 in AW-site sequences across orthologs should have only minor effects on WRI1 binding. We therefore  
261 selected 5 *A. thaliana* AW-sites (PK<sub>p</sub>β<sub>1</sub> at upstream position -148; BCCP2, -29; KASI, -58; PGLM1; -231;  
262 PGLM2, -164) which are conserved in all 12 species of this study (Supplemental Table S5) to measure WRI1  
263 affinities so we could compare them between aligned orthologous sequences (Fig. 4A-D). Due to the high  
264 degree of conservation, not all orthologous sequences were measured. All sequence variants of the 18 bp  
265 AW-box were evaluated. In all, 29  $k_d$  values that were measured for sequences in Fig. 4A-D fall well below  
266 the dissociation constant defined in Fig. 2 as a threshold for specific binding (i.e.  $k_d < 200$  nM), showing  
267 that for conserved AW-box sites the WRI1 binding affinity tends to be conserved as well (Fig. 4E).

268 While exploration of conservation of AW-box sites in this study is focused on the phylogenetic  
269 range of *Brassicaceae*, the AW-box can also be shown to be conserved within the flowering plants, as  
270 demonstrated for plastidic phosphoglycerate mutase in Fig. 4D. The *A. thaliana* genome contains two  
271 chloroplast isoforms for 2,3-bisphosphoglycerate-dependent phosphoglycerate mutase (PGLM1, PGLM2  
272 (Andriotis et al., 2010a). Based to the GenomicusPlants web resource (Louis et al., 2015), the two *A.*  
273 *thaliana* genes result from whole genome duplication events during *Brassicaceae* evolution. Accordingly,  
274 Supplemental Table S7 documents collinear/syntenic gene arrangement for the two syntelog *AtPGLM*  
275 genes. The alignment is extended by genomic regions from 2 *Brassicaceae* species, 7 dicot species outside  
276 the *Brassicaceae* and one monocot species (Supplemental Table S7). Supplemental Fig. S6 documents the  
277 high similarity in protein sequences among the PGLM orthologs described in Supplemental Table S7. Close  
278 inspection of the genomic regions upstream ATG for the 12 identified orthologous PGLM genes revealed  
279 a conserved AW-box motif (Fig. 4D) and all of the aligned sequences showed specific binding activity. A  
280 more extensive sequence alignment of PGLM upstream AW-box regions from 19 species is shown in  
281 Supplemental Fig. S7. Similar cases of deeply conserved AW-sites for other genes are shown in  
282 Supplemental Fig. S8 and S9.

### 283 **AW-boxes that bind WRI1 locate close to the transcriptional start site and associated genes tend to be** 284 **co-expressed with WRI1**

285 It has been shown for several organisms, including *A. thaliana*, that authentic cis-regulatory  
286 elements tend to be localized in proximity of the TSS (Yu et al., 2016). Accordingly, Fig. 5A shows that the  
287 62 AW-sites that were identified to specifically bind WRI1 *in-vitro* ( $K_d < 200$  nM, Fig. 2) are positioned close  
288 to the TSS. In addition to positional preference, it was assessed whether the genes for which *in-vitro*  
289 binding AW-sites were identified are co-expressed with WRI1. WRI1 is mainly expressed during seed  
290 development with a characteristic bell-shaped expression pattern (Ruuska et al., 2002). The expression

291 pattern of targets that follow the expression of WRI1 should therefore be positively correlated. Fig. 5B  
292 shows that, during seed development, the expression of the 53 gene targets for which specific *in-vitro*  
293 binding of AW-boxes to WRI1 was found ( $K_d < 200$  nM) tends to be positively correlated with the  
294 expression of WRI1.

### 295 **Conserved WRI1 gene targets map to central metabolism**

296 Overall, the motif and gene enrichment workflow shown in Fig. 1 identified 53 *A. thaliana* gene  
297 loci as putative WRI1 gene targets. For each gene at least one AW-box site has been characterized as  
298 specific *in-vitro* binding to WRI1 and to be conserved (Supplemental Table S5). Examples of this set of  
299 genes are highlighted in Table 4 (Sequence logos in Supplemental Fig. S4). In addition, we examined other  
300 genes with relevance to central metabolism, FAS and TAG biosynthesis that might have been missed by  
301 the enrichment workflow (Supplemental Table S6). For example, enoyl-CoA reductase (ENR) and Ketoacyl-  
302 ACP Synthase II (KASII) both are core components of FAS and single copy genes in *A. thaliana*, but no AW-  
303 sites were found by the workflow. Manual inspection of genomic sequences revealed AW-box sites  
304 positioned further upstream the ATG start than the genome wide applied search window of 1 to 500 bp  
305 upstream the ATG start. These sites were shown to specifically bind WRI1 in the *in-vitro* assay and to be  
306 well conserved (Supplemental Table S6). With this manual curation of two genes, conserved *in-vitro*  
307 binding AW-box sites are found for all steps in FAS between pyruvate kinase and Acyl-ACP thioesterase,  
308 the step that releases free fatty acids (Supplemental Table S10). Also, gene targets of the OPPP were  
309 inspected as this pathway is likely to contribute reducing equivalents to FAS. All manually curated cases  
310 are listed in Supplemental Table S6 and some are highlighted in Table 5 (Sequence logos in Supplemental  
311 Fig. S5). Altogether, 68 genes from Supplemental Table S5 and 16 from Supplemental Table S6 were  
312 mapped onto central metabolism (Fig. 6). All reactions and genes shown in the figure are identified in  
313 Supplementary Table S9. For 60 of 284 shown genes the AW-box was found enriched across ortholog  
314 upstream regions and *in-vitro* binding AW-sites were found (Fig. 6). In 46 of these cases *in-vitro* binding  
315 AW-sites are highly conserved, with the species conservation ratio above 0.8.

316 This study was based on a highly degenerate binding pattern. The quantitative determinations of  
317 WRI1 DNA binding affinity in this study allow for defining WRI1 DNA binding specificity, useful for further  
318 computational motif searches. Of the 204  $K_d$  values determined by MST (Supplemental Table S4), 97 are  
319 less than 25 nM. Supplemental Table S9 lists position specific base frequencies for the resulting consensus  
320 and a Sequence logo emerging from these sequences is shown in Supplemental Figure S11.

321

## 322 DISCUSSION

323 The transcription factor WRI1 is as a master regulator of lipid accumulation in developing seeds  
324 of *A. thaliana* and other plants (Cernac and Benning, 2004; Kong and Ma, 2018). While WRI1 is known to  
325 directly transcriptionally activate genes in FAS, we hypothesized that additional enzyme steps for sucrose  
326 catabolism between sucrose synthase and pyruvate kinase might also be direct targets. To increase  
327 confidence for identification of cis regulatory elements, a comparative genomics approach might be  
328 useful. Former studies have indicated that intragenomic comparison between *A. thaliana* and close  
329 relatives has the potential to discover a conserved *cis* regulome. For example, by comparative analysis of  
330 9 *Brassicaceae* genomes, Haudry *et al.* (2013) mapped conserved noncoding sequences for different  
331 genomic regions and found them to cover close to 10 % of the 5'UTR regions and the regions from 1 to  
332 200 bp upstream the TSS in the *A. thaliana* genome. Such conserved regions tend to be enriched in known  
333 regulatory motifs and to be under selective pressure (Haudry *et al.*, 2013). Here we developed a genome-  
334 wide analysis workflow to identify *A. thaliana* AW-box sites that are phylogenetically preserved across  
335 *Brassicaceae* species, followed by pathway analysis and quantification of WRI1 binding affinity by an *in-*  
336 *vitro* DNA binding assay (Fig. 1). While this process does not provide direct evidence of *in-vivo*  
337 functionality, multiple lines of evidence support the utility of our approach: 1) Our workflow identified a  
338 number of well-characterized AW-box sites for BCCP2, KASI, PK<sub>p</sub>-β<sub>1</sub> and SUS2 (Maeo *et al.*, 2009) (Table 4)  
339 along with genes controlling all steps of FAS (Supplemental Table S10). 2) Conservation of the AW-box  
340 sequences indicates that they are under purifying selection. For 5 select cases we demonstrated that WRI1  
341 binding activity that was measured for *A. thaliana* AW-sites is retained in phylogenetically conserved  
342 orthologous AW-box sites in the other *Brassicaceae* species investigated (Fig. 4). 3) For 53 *A. thaliana* gene  
343 loci identified herein, 62 high-affinity AW-binding sites were located close to the TSS (Fig. 5A), consistent  
344 with findings by Fukuda *et al.* (2013), suggesting that the *in-vivo* functionality of AW-box sites strongly  
345 depends on their proximity to the TSS. 4) Most of the 53 genes associated with the *in-vitro* AW-sites  
346 binding are co-expressed with WRI1 during seed development (Fig. 5B).

347 Fig. 6 graphically illustrates the information regarding AW-box enrichment across orthologous  
348 upstream regions in addition to WRI1 binding affinity onto a metabolic pathway scheme related to seed  
349 oil synthesis. For the conversion of pyruvate into fatty acids, evidence for AW-box site conservation and  
350 tight WRI1 binding affinity is found for 27 genes in three major protein complexes (Fig. 6). These include  
351 the chloroplast pyruvate dehydrogenase complex, acetyl-CoA carboxylase and fatty acid synthesis.  
352 Besides the canonical components of FAS, Beta Carbonic Anhydrase 5 is a likely WRI1 target (BCA5, Table

353 4) and might therefore be of general relevance for FAS. *AtBCA5* has been shown to be targeted to the  
354 chloroplast (Fabre et al., 2007). We propose that the enzyme might be required for conversion of CO<sub>2</sub> to  
355 bicarbonate (HCO<sub>3</sub><sup>-</sup>) when FAS operates at high rates. This is because within FAS, acetyl-CoA carboxylase  
356 (ACC) and ketoacyl-ACP synthase (KAS) create a cycle of carboxylation and decarboxylation where ACC  
357 requires bicarbonate (HCO<sub>3</sub><sup>-</sup>) as a substrate (Li-Beisson et al., 2013) while KAS releases CO<sub>2</sub>. In support of  
358 a requirement for carbonic anhydrase for high FAS rates, specific BCA inhibitors have been shown to  
359 inhibit FAS in developing embryos of cotton (*Gossypium hirsutum*) (Hoang and Chapman, 2002).

360 Similar to the concerted control of most genes encoding FAS enzymes by WRI1, a contiguous  
361 lower section of glycolysis is recognized as being controlled by WRI1 (Fig. 6; Table 4, 5), including the  
362 plastidic phosphoglycerate mutase (PGLM1, PGLM2) and two subunits of plastidic pyruvate kinase (PK),  
363 plastidic and cytosolic enolase (Eno) as well as the phosphoenolpyruvate/phosphate translocator (PPT1).  
364 A similar coherent pathway section can be recognized in pyrophosphate dependent phosphofructokinase  
365 (PFK), the cytosolic isoforms of fructose biphosphate aldolase (FBA), triose phosphate isomerase (TPI)  
366 and NAD- glycerol-3-phosphate dehydrogenase (GPDH) (Fig. 6). In other pathway sections seen in the  
367 upper half of glycolysis and the PPP evidence for WRI1 control is more sparsely distributed. However,  
368 some new gene targets in the upper section of the pathway yield some insights on possible modes of  
369 functioning of this complex and redundant network during seed oil deposition. For example, sucrose is  
370 cleaved by invertase or sucrose synthase. In either case fructose is obtained, which in turn can be  
371 transformed by hexokinase (HXK) or fructokinase (FRK) into fructose 6-phosphate (F6P) (Fig. 6). Among 5  
372 HXK and 7 FRK genes identified by our motif and gene enrichment workflow, only FRK3 was identified as  
373 a likely WRI1 target (Table 4, chloroplast localized FRK in Fig. 6). This finding can be rationalized with  
374 respect to a recent complete biochemical and genetic characterization of the FRK gene family in *A.*  
375 *thaliana* (Stein et al., 2016; Riggs et al., 2017). While no severe seed phenotype was found for the single-  
376 KO mutation of FRK3, a FRK1-FRK3 double-KO mutation resulted in a severe wrinkled seed phenotype  
377 with strong reduction in seed oil content (Stein et al., 2016). In conclusion, while our approach singled out  
378 FRK isoform 3 as a new WRI1 target, the genetic evidence shows that seed oil synthesis depends  
379 predominantly, although not exclusively, on contributions of this specific isoform. In addition to FRK3 we  
380 identified plastidic phosphoglucose isomerase (PGI1) as a putative WRI1 target (Table 4, Fig. 6). As in the  
381 case of FRK3, there is recent genetic evidence in support of PGI1 being important for TAG synthesis. A  
382 PGI1 mutant (*pgi1-2*) was reported to have reduced seed yield per plant, seed size and seed oil content  
383 (Bahaji et al., 2018). Reciprocal crosses of *pgi1-2* with wild type showed that the low oil, wrinkled seed

384 phenotype is independent of maternal influences (Bahaji et al., 2018). This strongly corroborates our  
385 finding of PGI1 being a WRI1 target and thus important for oil synthesis.

386 Additional putative WRI targets relate to the OPPP, which is considered a major source of  
387 reductant in heterotrophic plant tissues, delivering NADPH for various biosynthetic processes (Neuhaus  
388 and Emes, 2000; Kruger and von Schaewen, 2003), including FAS (Neuhaus and Emes, 2000; Rawsthorne,  
389 2002). We identified several OPPP-associated genes as likely WRI1 targets (see Table 5, Fig. 6):  
390 Transketolase (TKL1), transaldolase (TA2), and two isoforms of 6-phosphogluconate dehydrogenase PGD3  
391 and PGD1, the two of which accumulate both in the cytosol and the chloroplast (Holscher et al., 2016).  
392 Based to the GenomicusPlants web resource (Louis et al., 2015), PGD1 and PGD3 result from a whole  
393 genome duplication event at the basis of the *Brassicaceae*. One AW-box site appears to be conserved for  
394 both genes (Supplemental Table S6) and is also found more widely conserved across dicot species  
395 (Supplemental Fig. S9). WRI1 binding assays also implicate functional AW-sites for isoforms of glucose 6-  
396 phosphate dehydrogenase, but less well conserved (G6PD4, Table 5).

397 During seed storage synthesis, chloroplast biosynthetic activities might depend on the movement  
398 of hexose carbon between cytosol and chloroplast. Our analysis implicates related transport functions to  
399 be controlled by WRI1 (Fig. 6). Previous literature has emphasized the role of the glucose 6-  
400 phosphate/phosphate translocator (GPT) for entry of glucose 6-phosphate into the chloroplast during  
401 early phases of seed development in *A. thaliana* and *B. napus* (Eastmond and Rawsthorne, 2000; Ruuska  
402 et al., 2002; Kubis et al., 2004). *A. thaliana* contains two GPT genes. AtGPT1 (AT5G54800) is reported to  
403 be essential in pollen and early embryo development (Niewiadomski et al., 2005; Andriotis et al., 2010b),  
404 while loss of AtGPT2 (AT1G61800) seems not to have a severe phenotype (Niewiadomski et al., 2005).  
405 AtGPT1 has been ascribed a role in carbon import during early and later stages of seed development when  
406 it may be relevant to feed into starch synthesis and FAS (Ruuska et al., 2002; Niewiadomski et al., 2005;  
407 Andriotis et al., 2010c). Here we found a conserved binding site in the promoter regions of GPT2 orthologs  
408 (Table 5) and some of the orthologous sites were found to bind WRI1 *in-vivo*, hinting at functional  
409 relevance of GPT2 in oil synthesis. However, the sites in GPT2 of *A. thaliana* and three other species are  
410 divergent from the AW-box consensus and did not bind in the *in-vitro* WRI1 binding assay (Supplemental  
411 Table S6), making it more ambiguous as to whether GPT2 is controlled by WRI1. In addition to GPT2, we  
412 found a conserved AW-box in the promoter of the plastidic glucose translocator (PGLCT) (Weber et al.,  
413 2000) (Table 5, Fig. 6). The PGLCT has been implicated to be involved in photo-assimilate export from leaf  
414 chloroplasts when starch mobilization takes place in the dark (Cho et al., 2011). If this transporter has a



415 role in a heterotrophic context in seed development during oil accumulation, it likely facilitates entry of  
416 glucose into the chloroplast rather than export. In support of this idea, isolated chloroplasts of *Brassica*  
417 *napus* developing embryos have been shown to have the ability to take up glucose with a saturation  
418 kinetics consistent with transporter facilitated uptake (Eastmond and Rawsthorne, 1998). Moreover, the  
419 uptake capacity of embryo chloroplasts was substantially higher than that of isolated leaf chloroplasts  
420 (Eastmond and Rawsthorne, 1998).

421 In addition to the importance of transport of hexose phosphates or hexose across the chloroplast  
422 envelope for oil synthesis, the cytosolic glycolysis pathway has been deemed to be important for seed  
423 filling as well (White et al., 2000; Ruuska et al., 2002). More recent metabolic flux studies in *B. napus*  
424 developing embryos give further support to substantial carbon flux through cytosolic glycolysis with  
425 particular relevance of the phosphofructokinase reaction in flux control (Schwender et al., 2015). In the  
426 cytosol, pyrophosphate-fructose-6-phosphate-phosphotransferase (PFK, EC 2.7.1.90) is an allosterically  
427 controlled heteromeric complex of  $\alpha$ - and  $\beta$ -subunits (Mustroph et al., 2013). During seed development  
428 in different oilseed species, PFK subunits seem to be expressed at higher levels than the cytosolic ATP-  
429 dependent PFK (Troncoso-Ponce et al., 2011). Consistent with the suspected relevance of cytosolic PFK  
430 for seed oil synthesis we found conserved *in-vitro* functional AW boxes in the upstream regions of both  
431  $\alpha$ - and  $\beta$ -subunits of PFK (Table 4, 5) (Fig. 6).

432 Although TAG biosynthesis genes are not generally viewed as direct targets of WRI1, our data  
433 identify several candidates for direct WRI1 targeting associated to the TAG biosynthetic sub-network (Fig.  
434 6): These include two isoforms of cytosolic glycerol 3-phosphate dehydrogenase (GPDH), Acyl-CoA binding  
435 protein 6 (ACBP6), Diacylglycerol acyltransferase 2 (DGAT2) and REDUCED OLEATE DESATURATION1  
436 (ROD1) (Table 4, Fig. 6). Of the three different and functionally non-redundant types of DGAT found in  
437 plants, DGAT1 has been suggested to carry most of the TAG synthesis during seed development (Li-  
438 Beisson et al., 2013). However, our results suggest that DGAT2 is under direct control of WRI1 (Table 4).  
439 In contrast to DGAT1, *AtDGAT2* has been reported to have preference for 18:3-CoA relative to other fatty  
440 acid CoA esters (Zhou et al., 2013), which could point to a contribution of DGAT2 to channeling  
441 polyunsaturated fatty acids into TAG. One of the other genes putatively under direct control of WRI1,  
442 ROD1, encodes for phosphatidylcholine:diacylglycerol cholinephosphotransferase (PDCT) and has also  
443 been implicated in regulating the poly-unsaturation state of TAG (Lu et al., 2009). Consistent with WRI1  
444 having control over ROD1 expression, ROD1 expression is significantly increased when WRI1 is  
445 overexpressed in *A. thaliana* developing seeds (Adhikari et al., 2016) or in *Nicotiana benthamiana* leaves

446 (Grimberg et al., 2015). In addition, ROD1 expression was found to be reduced in the *wri1 wri3 wri4*  
447 mutant (To et al., 2012). Another TAG biosynthetic enzyme putatively under direct control of WRI1 and  
448 involved in TAG synthesis is Glycerol 3-phosphate dehydrogenase, which provides the glycerol backbone  
449 for TAG. In *A. thaliana*, two cytosolic isoforms (AT2G41540, AT3G07690) have been identified (Shen et al.,  
450 2006) as well as one plastidic one AT5G40610 (Wei et al., 2001). Remarkably, we have found indications  
451 for control by WRI1 for all three genes (Fig. 6).

452 The transcription factor WRI1 is positioned towards the end of a gene regulatory cascade  
453 governing seed development and storage accumulation. WRI1 is likely under direct control of LEAFY  
454 COTYLEDON1 (LEC1), LEAFY COTYLEDON2 (LEC2) and FUSCA3 (FUS3) (Fatihi et al., 2016). Data presented  
455 herein suggests that WRI1 directly controls its own regulator, LEAFY COTYLEDON1 (Table 4), implying a  
456 condition of positive or negative autoregulation. In addition, LEAFY COTYLEDON1-LIKE (L1L) (Table 5) as  
457 well as the basic leucine zipper transcription factor 67 (bZIP67) (Table 4) were found as putative WRI1  
458 targets. L1L is known to act in association with bZIP67 in transcriptional activation of several genes related  
459 to seed storage accumulation (Yamamoto et al., 2009; Mendes et al., 2013), which includes cruciferin 3  
460 (CRU3) and SUS2 (Yamamoto et al., 2009) for both of which we found conserved high affinity AW-boxes  
461 (Table 4, Table 5).

## 462 **Conclusions**

463 The motif and gene enrichment workflow applied in this study identified numerous known WRI1  
464 targets related to oil synthesis in addition to a battery of additional genes, including those coding for  
465 enzymes for the conversion of sugars to pyruvate and enzymes in the TAG biosynthesis sub-network.  
466 While this study was mostly limited to the *Brassicaceae* family, we provided exploratory examples of AW-  
467 sites being deeply conserved in other plant families (Supplemental Fig. S7-S9). In this work we  
468 demonstrate that a workflow based on the identification of phylogenetically conserved binding sites along  
469 with highly quantitative *in-vitro* binding assays can be a powerful approach to identify potential regulatory  
470 networks. The analysis presented herein can be generally applied to other TFs and expanded to other  
471 plant families.

472 The GO term and pathway analysis stage of the genome analysis workflow (Fig. 1) narrowed down  
473 the initial enriched gene set to 73 putative WRI1 targets that belong to specific pathways in seed oil  
474 synthesis. It is likely that there are additional targets of WRI1 that are outside of oil biosynthesis (Kong et  
475 al., 2017; Liu et al., 2019), and that it might be important to explore these if WRI1 is to be used for  
476 metabolic engineering of oil production (Kong et al., 2019). Such additional targets might have been



477 excluded in the pathway enrichment step of our process. Further refinements of the comparative  
478 genomics approach presented herein might be helpful to identify such targets. Another aspect of  
479 functional overlap not explored here is cuticular wax biosynthesis. It has been shown that *A. thaliana*  
480 WRINKLED4, a close homolog to WRI1, regulates cuticular wax biosynthesis and has many gene targets in  
481 common with WRI1 (Park et al., 2016). Since Fig. 6 shows three WRI1 gene targets related to wax/cutin  
482 synthesis it would be interesting to use the same approach to evaluate WRINKLED4 gene targets and  
483 investigate its regulatory overlap with WRI1.

484

485

486

## 487 MATERIAL AND METHODS

### 488 Data sources and processing

489 Sequence files corresponding to upstream and downstream sequences of the annotated start codon/end  
490 codon of *Arabidopsis thaliana* were downloaded from The Arabidopsis Information Resource (TAIR) (Rhee  
491 et al., 2003), version 10 (See details in Supplemental Table S1). For 12 Brassicaceae species used in this  
492 study, files for genome sequences, protein sequences and genome annotation (General Feature Format,  
493 GFF) were retrieved from sources listed in Supplemental Table S1. In-house generated PERL and PYTHON  
494 scripts were used to process and analyze the sequence information. Data processing and analysis was also  
495 done using Microsoft Excel (<http://www.microsoft.com>) and with Matlab (version R2016a, The  
496 MathWorks, Inc., Natick, Massachusetts, United States).

497 Gene annotation and classification information on *Arabidopsis thaliana* lipid metabolism genes in was  
498 collected from the ARALIP database ([http://aralip.plantbiology.msu.edu/data/aralip\\_data.xlsx](http://aralip.plantbiology.msu.edu/data/aralip_data.xlsx), accessed  
499 June 29, 2017) (Li-Beisson et al., 2013; McGlew et al., 2014). The database contains an expert curated list  
500 of 822 reactions / proteins associated to lipid metabolism. 775 AGI gene locus identifiers are associated  
501 to 24 lipid pathways. In addition, we used a pathway classification as given by *Bna572*, a manual curated  
502 large-scale metabolic model for the storage compound accumulation during seed development in *Brassica*  
503 *napus* (Hay et al., 2014). 962 AGI gene locus identifiers are categorized into 77 metabolic pathways. As a  
504 more comprehensive source we used MapMan hierarchical classifications for *Arabidopsis* genes  
505 (<http://www.gabipd.org/database/java-bin/MappingDownloader>)(Usadel et al., 2009).

### 506 Synteny analyses for Brassicaceae genomes and other species

507 Syntenic orthology relations between protein encoding genes of *A. thaliana* and other species  
508 were derived by using the SynOrths tool (version 1.0, Cheng et al., 2012). In short, this tool derives  
509 pairwise synteny relations based on protein sequence similarity and gene adjacencies on contigs (Cheng  
510 et al., 2012). For each comparison, the *A. thaliana* genome was always defined as the target genome.  
511 Default parameter settings were applied since they have already been optimized for the closely related  
512 Brassicaceae genomes (Cheng et al., 2012). In addition to SynOrths outputs, published synteny  
513 information related to *Brassica napus* and *Camelina sativa* was used as additional reference (Chalhoub et  
514 al., 2014; Kagale et al., 2014). Within the set of Brassicaceae genomes used here, the genome assembly  
515 of *Aethionema arabicum* seemed to be of lesser quality, as judged by the size distribution of contig lengths  
516 (Haudry et al., 2013). Therefore, homology relations between the *A. thaliana* genome and *A. arabicum*  
517 was derived only based on similarity between sequences of predicted proteins. Protein sequence

518 alignments were established by BLAST (protein sequence similarity) (Altschul et al., 1997) with the  
519 predicted protein sequences of *A. arabicum* as query against a database of TAIR10 predicted proteins  
520 (representative gene models). BlastP results were filtered with an E-value cut-off of  $10^{-7}$ . Using a custom  
521 script, alignments spreading over multiple lines (broken alignments) were joined. Top hits were retained  
522 as homology relations but rejected if the alignment length was less than 70 % of the length of the query,  
523 or if the percentage of identical matches was below 60 %.

524 Besides the automated analysis, syntenic relationships were tracked manually in a few cases to  
525 explore phylogenetic conservation from *A. thaliana* to species outside the Brassicaceae. Genomic  
526 sequences of *Citrus sinensis*, *Daucus carota*, *Populus trichocarpa*, *Ricinus communis*, *Sesamum indicum*,  
527 *Sorghum bicolor*, *Tarenaya hassleriana* and *Vitis vinifera* were mined using the online resources of the  
528 National Center for Biotechnology Information (NCBI) ([www.ncbi.nlm.nih.gov](http://www.ncbi.nlm.nih.gov)) (Coordinators, 2018).  
529 Protein searches among the species was done using NCBI BLAST (Johnson et al., 2008). To identify the  
530 gene order in chromosomal neighborhoods of genes of interest of the non-Brassicaceae species, genomic  
531 information (GFF files) was accessed at NCBI from sources as listed in Supplemental Table S1.

### 532 **Mining of genomic DNA sequences**

533 Nucleotide sequences 500 bp upstream of the ATG start codon were extracted for each protein  
534 encoding gene locus and for each genome of the 12 Brassicaceae species. For this purpose, GFF files  
535 (Supplemental Table S1) were mined for genomic coordinates of start codons. The tool gffread (Trapnell  
536 et al., 2010) was then used to extract DNA sequences from -1 to -500 nt upstream the start codon from  
537 genomic sequences. In case of *A. thaliana*, sequences were extracted only for one gene model per locus  
538 (representative gene models). In particular, for each gene in the sequence file  
539 “TAIR10\_upstream\_500\_translation\_start\_20101028” (Supplemental Table S1) start codon positions  
540 were identified from sequence headers and matched to one gene model version in the TAIR10 gff file  
541 (genomic feature “protein”). This allowed to define genomic coordinates for regions upstream and  
542 downstream the transcriptional start codon and downstream the stop codon for each representative gene  
543 model.

### 544 **Search of DNA sequences for string pattern matches**

545 Searching DNA sequences for all occurrences of a string pattern was done using an in-house tool.  
546 The search tool was tested for accuracy by comparing search outputs with the outputs of another pattern  
547 search tool ([http://www.bioinformatics.org/sms2/dna\\_pattern.html](http://www.bioinformatics.org/sms2/dna_pattern.html))(Stothard, 2000). For each *A.*  
548 *thaliana* gene locus different genomic regions (Upstream and downstream ATG start, intron sequences,

549 downstream stop codon) were searched for occurrence of the AW-box (5'-CNTNG(N)<sub>7</sub>CG-3', N = A, C, T or  
550 G) in both sense and antisense directions. Overlapping motif hits were recognized. For further processing,  
551 detected motif matches were recorded along with the gene ID and genomic position of the searched  
552 sequence as well as the position and orientation of detected sequences relative to the ATG start.

### 553 **Collection of AW-box sites and assessment of sequence conservation**

554 Nucleotide sequences 500 bp upstream of the ATG start codon from 12 Brassicaceae species were  
555 searched for the AW-box binding consensus in both strands and matches were recorded with adjacent  
556 sequence context as 18 nc sequences (5'-NNCNTNG(N)<sub>7</sub>CGNN-3'). To trace conserved motif instances,  
557 AW-box sites found in *A. thaliana* upstream regions were compared to sites found in OURs (pairwise un-  
558 gapped alignments). We considered sequence conservation to be given if two motif instances were  
559 identical in orientation relatively to the ATG start and if the sequence comparison of the two 18 nc  
560 sequences had at least 14 identities (77.8 % identity). This identity threshold was empirically derived by  
561 comparison of randomly generated AW-box sites, given a 33.2 % G+C content as found in upstream  
562 regions of *A. thaliana* (Supplemental Fig. S3A). The mean expectation of identities between two random  
563 sampled AW-box sites was 8.613 and 14 or more identities were obtained for 0.2 % of comparisons, i. e.  
564 the by-chance probability to judge two random AW-sites to be conserved is 0.002 (Supplemental Fig. S3A).  
565 Conserved sequences from multiple pairwise comparisons between an *A. thaliana* AW-box site and  
566 orthologous sites were aggregated into sets of conserved sequences and further into sets of conserved  
567 species (Supplemental Fig. S3B). The number of conserved species divided by 12 (total number of assessed  
568 species) is the species conservation ratio. If AW-box site binding affinity to WRI1 protein was measured,  
569 the species conservation ratio was determined by only tracking conservation of specific binding AW-sites.

### 570 **Sequence logos and computation of information content**

571 Sequence logos were created using the WebLogo version 2.8.2 online tool (Crooks et al.,  
572 2004)(<http://weblogo.berkeley.edu/>). The logos created in this study are intended to compare alignments  
573 of binding site sequences between each other, not to quantify how degenerate a site is relative to a  
574 genomic background. This is important because WebLogo assumes uniform background symbol  
575 distribution (all four bases appear with equal background frequency of 0.25), while the genomes studied  
576 here have significantly skewed background base distributions. To compare sequence alignments based on  
577 numerical values, the information content was calculated as described by Workman *et al.* (2005), based  
578 on a uniform background base composition and using the logarithm base 2. For computation of base  
579 frequencies when using small datasets, a pseudo-count value of 0.0001 was used.

580 **Enrichment analysis of presence of AW-box motifs in different Arabidopsis genome features**

581 To model the occurrence of a motif in gene regions of uniform size (e.g. 500 bp upstream the ATG  
582 start codon), the hypergeometric distribution was applied. One or more matches of the AW-box motif  
583 were counted as a motif hit. If among a total population  $N$  (total number of searched gene regions) there  
584 are  $K$  motif hits, then the probability to find  $m$  motif hits in a sub-set of  $n$  searched gene regions is given  
585 by the probability mass function for the hypergeometric distribution:

586 
$$P(X = m) = \frac{\binom{K}{m} \binom{N-K}{n-m}}{\binom{N}{n}} \quad (1).$$

587 To assess the expected value for  $m$  AW-motif hits among the  $n = 52$  FAS genes,  $P(X=m)$  was computed for  
588  $m$  ranging within zero and 52 by using the respective Microsoft EXCEL<sup>®</sup> spreadsheet function  
589 (HYPGEOM.DIST). From the results the approximate range of  $m$  for which 99.9 % of the observations are  
590 to be expected (99.9 % confidence interval) was determined symmetrically around the mean expectation  
591 value for  $m$  ( $nK/N$ ).

592 To test for enrichment of the AW-box across sets of OURs, the cumulative hypergeometric  
593 probability mass function was applied. Here  $N$  is the number of protein-encoding genes for which 500 bp  
594 upstream regions were searched among all 12 genomes and  $K$  is the total number of AW-box hits. In case  
595 of overrepresentation ( $m \geq nK/N$ ), the probability of observing  $m$  or more AW-box hits within a sample  
596 of  $n$  genes (ortholog group size) is given by:

597 
$$p(x \geq m) = 1 - \sum_{i=0}^{m-1} \frac{\binom{K}{i} \binom{N-K}{n-i}}{\binom{N}{n}} \quad (2).$$

598 The false positive rate was estimated with an empirical null model: All  $p$ -value computations were  
599 repeated after randomization of the upstream sequences, using the tool “fasta-shuffle-letters” from the  
600 MEME suite (Bailey et al., 2009). For a given significance threshold,  $t$ , the number of significance calls for  
601 the randomized sequence data ( $p$ -value  $\leq t$ ), divided by the number of significance calls for the  
602 unperturbed sequence data was taken to be the False Discovery Rate (FDR).

603 To test for enrichment of the AW-box in *A. thaliana* intron sequences, the sequence file  
604 “TAIR10\_intron\_20101028” was searched. Since the searched DNA sequences were not of uniform size,  
605 the hypergeometrical model was not applied. An estimation for the frequency of motif matches by chance  
606 was done based on random shuffling of the intron sequences for the 52 FAS genes.

## 607 **Pathway and GO-term enrichment analysis**

608           The test for gene enrichment in pathways was done using equation 2 to assess the probability of  
609 observing  $m$  or more *A. thaliana* genes for which the AW-box is conserved across OURs within a set of  $n$   
610 genes representing a pathway. In this case  $N$  is the number of ortholog gene sets and  $K$  the number of *A.*  
611 *thaliana* genes for which the AW-box was significantly enriched across OURs. Only pathway genes that  
612 are part of the background set  $N$  were counted. Adjustment for multiple hypothesis testing was done by  
613 multiplying the  $p$ -values with the total number of gene sets tested for (Bonferroni correction). Only gene  
614 sets with 2 or more members were counted.

615           Gene Ontology (GO) term enrichment analysis for sets of Arabidopsis genes (TAIR ID) was  
616 performed with the functional annotation tool of the online bioinformatics resources given by the  
617 Database for Annotation, Visualization and Integrated Discovery (DAVID) (v6.8; <https://david.ncifcrf.gov/>,  
618 Jiao *et al.*, (2012)).

## 619 **Evaluation of publicly accessible gene expression data**

620           To analyze gene expression during seed development we re-analyzed microarray gene expression  
621 data from Schmidt *et al.*, (2005). In short, *Arabidopsis* developmental series microarray gene expression  
622 data with 22,810 signals for 79 developmental stages and different tissues in plant development were  
623 analyzed (<http://www.ncbi.nlm.nih.gov/bioproject/96937>). Expression values for 8 stages of seed  
624 development (sample identifiers ATGE\_76 to ATGE\_84) were averaged across the three replicates.  
625 Pairwise Pearson's correlation coefficients were computed between WRI1 (At3g54320, Affymetrix  
626 identifier "251891\_at") and each of the other array signals. To disregard lower intensity expression values,  
627 correlation values were only derived for 17058 signals, which is the upper 75<sup>th</sup> percentile of the sum of  
628 expression values across the 8 seed development stages. Significance of Pearson's correlation coefficients  
629 (sample size  $n$ ) was tested for with the Student's  $t$ -test for  $n-2$  degrees of freedom with critical  $t$ -values  
630 derived from correlation coefficients as described by Olson (1987).

## 631 **Microscale thermophoresis**

632           Specific binding of AW sites by AtWRI1 was measured by MST (Seidel *et al.*, 2013). A genetic  
633 construct combining the coding region responsible for DNA binding, green fluorescent protein (GFP) and  
634 a HIS-tag (AtWri<sub>150-240</sub>-GFP-HIS) was expressed in *E. coli* and the protein purified as described before (Liu  
635 *et al.*, 2019). Thermophoretic assays were conducted using a Monolith NT.115 apparatus  
636 (NanoTemperTechnologies, South San Francisco, CA; [nanotempertech.com](http://nanotempertech.com)). Assay conditions were as  
637 previously (Liu *et al.*, 2019). dsDNA oligomers were hybridized using a thermal cycler. For determining a

638 dissociation constant ( $k_d$ ), 16 reactions were prepared: 8 nM of AtWRI1<sub>58-240</sub>-GFP was incubated with a  
639 serial (1:1) dilution of the ligand (dsDNA) from 1.25  $\mu$ M to 38.81 pM or from 6.25  $\mu$ M to 190 pM. Samples  
640 of approximately 10  $\mu$ l were loaded into capillaries and inserted into the MST NT.115 instrument loading  
641 tray. All thermophoresis experiments were carried out at 25 °C using 40% MST power and 100% or 80%  
642 LED power. The data were fitted with the NanoTemper Analysis software v2.2.4. To ensure reproducibility,  
643 any series of measurements performed at one day included a reference DNA probe (Ligand 10,  
644 Supplementary Table S4). For this ligand the average binding affinity ( $K_d$ ) out of multiple series of  
645 measurements was  $7.0 \pm 3.5$  nM. In each series of measurements,  $k_d$  values given by the analysis software  
646 were only accepted if the response amplitude was within about  $\pm 20$  % of the response amplitude  
647 measured for the reference DNA probe (Supplemental Fig. S10). Otherwise, the DNA fragmented was  
648 assessed to be “not binding”. For examples of evaluation of analysis MST results see Supplemental Fig.  
649 S10. Statistics for  $k_d$  values (standard deviation) were derived from three measurements of a DNA ligand  
650 obtained from different measurement series.

651

652 **Accession Numbers**

653 Sequence data from this article can be found in the Arabidopsis Genome Initiative or GenBank/EMBL  
654 databases under the following accession numbers: ACBP6(AT1G31812), AIL6(AT5G10510),  
655 BADC1(AT3G56130), BADC2(AT1G52670), BADC3(AT3G15690), BC(AT5G35360), BCA5(AT4G33580),  
656 BCCP1(AT5G16390), BCCP2(AT5G15530), bZIP67(AT3G44460), CRU3(AT4G28520), CT- a(AT2G38040),  
657 DGAT2(AT3G51520), ENO1(AT1G74030), FRK1(AT5G51830), FRK3(AT1G66430), G6PD4(AT1G09420),  
658 GPDHc1(AT2G41540), GPDHc2(AT3G07690), GPDHp(AT5G40610), GPT1(AT5G54800), GPT2(AT1G61800),  
659 KASI(AT5G46290), L1L(AT5G47670), LEC1(AT1G21970), LOS2(AT2G36530), PFP-a(AT1G76550), PFP-  
660  $\beta$ (AT1G12000), PGD1(AT1G64190), PGD3(AT5G41670), PGI1(AT4G24620), PGLCT(AT5G16150),  
661 PGLM1(AT1G22170), PGLM2(AT1G78050), PII(AT4G01900), PKp- $\alpha$ (AT3G22960), PKp- $\beta$ 1(AT5G52920),  
662 PPT1(AT5G33320), ROD1(AT3g15820), SUS2(AT5G49190), TA2(AT5G13420), TKL1(AT3G60750),  
663 WRI1(AT3G54320).

664

665

666

667 **Supplemental Data**

668 **Supplemental Table S1:** Sources for genomic information.

669 **Supplemental Table S2:** Enrichment of the AW-box motif in genomic features of genes encoding for fatty  
670 acid biosynthesis in *Arabidopsis thaliana*

671 **Supplemental Table S3:** GO term and pathway enrichment for 915 *A. thaliana* genes for which the AW-  
672 box is significantly enriched in upstream regions across orthologs.

673 **Supplemental Table S4:** Analysis of binding affinity of DNA fragments to AtWRI1 by Microscale  
674 Thermophoresis (MST).

675 **Supplemental Table S5:** Conservation of the AW-box motif in regions upstream ATG for 12 brassicaceae  
676 species (73 genes identified by pathway analysis).

677 **Supplemental Table S6:** Conservation of the AW-box motif in regions upstream ATG for 12 brassicaceae  
678 species (21 additional genes).



679 **Supplemental Table S7:** Syntenic gene analysis for genomic regions close to 2,3-bisphosphoglycerate-  
680 dependent phosphoglycerate mutase (PGLM) in 11 species.

681 **Supplemental Table S8:** Identification and details on *Arabidopsis thaliana* genes shown in Figure 6.

682 **Supplemental Table S9:** Positional Frequency Matrix (PFM) for 97 AW-box sites with measured  $k_d$  values  
683 of less than 25 nM (MEME format).

684 **Supplemental Table S10.** AW-box motif found for genes in the *A. thaliana* genome encoding components  
685 related to fatty acid biosynthesis.

686 **Supplemental Figure S1:** Distribution of ortholog gene set size after synteny analysis.

687 **Supplemental Figure S2.** Enrichment of the AW-box across orthologous upstream regions of 12  
688 *Brassicaceae* genomes.

689 **Supplemental Figure S3.** Conservation of AW-box sites between *Arabidopsis thaliana* and other species.

690 **Supplemental Figure S4:** Conserved AW-box sites for WRI1 gene targets discovered by the motif and gene  
691 enrichment workflow.

692 **Supplemental Figure S5:** Conservation of the AW-box sites for additional WRI1 gene targets.

693 **Supplemental Figure S6:** Alignment of protein sequences for chloroplast 2,3-bisphosphoglycerate-  
694 dependent phosphoglycerate mutase from 11 plant species.

695 **Supplemental Figure S7.** Deep conserved AW-box site in upstream regions of chloroplast isoforms for 2,3-  
696 bisphosphoglycerate-dependent phosphoglycerate mutase (PGLM) of mono- and eudicot plants.

697 **Supplemental Figure S8.** Deep conserved AW-box site in upstream regions of plastidic pyruvate kinase  $\beta_1$ -  
698 subunit of mono- and eudicot plants.

699 **Supplemental Figure S9.** Deep conserved AW-box site in upstream regions of 6-phosphogluconate  
700 dehydrogenase (PGD) genes of eudicot plants.

701 **Supplemental Figure S10.** Examples for binding curves of AtWRI1<sub>58-240</sub>-GFP and 28 bp DNA ligands.

702 **Supplemental Figure S11.** Sequence logo for 97 sequences with  $k_d$  value < 25 nM.

703

704 **ACKNOWLEDGEMENTS**

705 This work was supported by the U.S. Department of Energy, Office of Science, Office of Basic Energy  
 706 Sciences under contract numbers DE-SC0012704 (to J.Sc.) and KC0304000 (to J.Sh.) - specifically  
 707 through the Physical Biosciences program of the Chemical Sciences, Geosciences and Biosciences  
 708 Division.

709

710 **Tables**

711 **Table 1.** Enrichment of the AW-box motif in genomic features of genes encoding for fatty acid  
 712 biosynthesis in *Arabidopsis thaliana*. For all protein encoding genes, regions relative to the start or stop  
 713 codon were searched for the AW-box motif. Presence of the AW-box (AW-box hits) within the set of 52  
 714 FAS genes was modeled by the hypergeometric distribution based on the genome wide background.  
 715 More details and controls see Supplemental Table S2.

| genomic feature relative to start / stop codons      | genome wide number of hits (frequency of hits [%]) | Mean expected number of hits for 52 draws [99.9% confidence range] | number of hits for 52 FAS genes | fold enrichment | hypergeometric <i>p</i> -value |
|------------------------------------------------------|----------------------------------------------------|--------------------------------------------------------------------|---------------------------------|-----------------|--------------------------------|
| 1 to 500 bp upstream start                           | 5540 (20.2) <sup>1</sup>                           | 10.5 [0, 20]                                                       | 30                              | 2.85            | 3 x 10 <sup>-9</sup>           |
| 501 to 1000 bp upstream start                        | 5675 (20.7) <sup>1</sup>                           | 10.8 [1, 21]                                                       | 12                              | 1.11            | 0.39                           |
| 1001 to 1500 bp upstream start                       | 6188 (22.6) <sup>1</sup>                           | 11.7 [1, 21]                                                       | 12                              | 1.02            | 0.52                           |
| 500 bp downstream start                              | 11414 (41.6) <sup>2</sup>                          | 21.7 [10, 32]                                                      | 25                              | 1.15            | 0.21                           |
| 500 bp downstream stop                               | 4569 (16.7) <sup>2</sup>                           | 8.7 [0, 18]                                                        | 6                               | 0.69            | 0.88                           |
| Randomized controls for regions upstream start codon |                                                    |                                                                    |                                 |                 |                                |
| 1 to 500 bp upstream start <sup>3</sup>              | 5919 (21.6)                                        | 11.2 [1, 21]                                                       | 9                               | 0.80            | 0.82                           |
| random sequences <sup>4</sup>                        | 5889 (21.5)                                        | 11.2 [1, 21]                                                       | n/a                             | n/a             | n/a                            |

716 <sup>1</sup> average GC content close to 33 %; <sup>2</sup>The frequency of hits is different from the upstream regions, which  
 717 is explainable by differing GC contents in these regions. See additional controls for variability on GC

718 content in Supplemental Table S2A. <sup>3</sup>Sequences were randomly shuffled using the “fasta-shuffle-letters”  
719 tool from the MEME suite (Bailey et al., 2009) with default settings; <sup>4</sup>pseudo-random 500 bp sequences  
720 generated with the FaBox online tool ([http://users-](http://users-birc.au.dk/palle/php/fabox/random_sequence_generator.php)  
721 [birc.au.dk/palle/php/fabox/random\\_sequence\\_generator.php](http://users-birc.au.dk/palle/php/fabox/random_sequence_generator.php)) (VILLESEN, 2007) were generated using  
722 the average GC content in the -1 to -500 bp upstream sequences as input (33%).

723

724

725 **Table 2.** Species used in the phylogenetic foot printing approach and main results of genome mining for  
 726 syntenic orthology relations and promoter regions. More details on data sources see Supplemental  
 727 Table S1.

| Species                                                      | Subfamily /<br>tribe <sup>1</sup> | Gene<br>count <sup>2</sup> | Percentage<br>of genes in<br>orthology<br>alignment | Genes with<br>AW-motif<br>hit 500 bp<br>upstream<br>ATG start | frequency<br>of hits [%] | Genome publication         |
|--------------------------------------------------------------|-----------------------------------|----------------------------|-----------------------------------------------------|---------------------------------------------------------------|--------------------------|----------------------------|
| <i>Arabidopsis thaliana</i>                                  | Camelineae <sup>3</sup>           | 27414                      | 93                                                  | 5540                                                          | 20.2                     | (Lamesch et al., 2012)     |
| <i>Arabidopsis lyrata</i>                                    | Camelineae                        | 31065                      | 73                                                  | 6534                                                          | 21.0                     | (Rawat et al., 2015)       |
| <i>Camelina sativa</i>                                       | Camelineae                        | 89285                      | 70                                                  | 17428                                                         | 19.5                     | (Kagale et al., 2014)      |
| <i>Capsella grandiflora</i>                                  | Camelineae                        | 24774                      | 81                                                  | 4673                                                          | 18.9                     | (Slotte et al., 2013)      |
| <i>Capsella rubella</i>                                      | Camelineae                        | 26519                      | 79                                                  | 5400                                                          | 20.4                     | (Slotte et al., 2013)      |
| <i>Cardamine hirsuta</i>                                     | Cardamineae <sup>4</sup>          | 29452                      | 75                                                  | 6206                                                          | 21.1                     | (Gan et al., 2016)         |
| <i>Lepidium meyenii</i>                                      | Lepidieae <sup>4</sup>            | 96413                      | 72                                                  | 26733                                                         | 27.7                     | (Zhang et al., 2016)       |
| <i>Brassica napus</i>                                        | Brassicaceae <sup>4</sup>         | 101039                     | 94                                                  | 23217                                                         | 23.0                     | (Chalhoub et al., 2014)    |
| <i>Thellungiella halophila</i> ( <i>Eutrema halophilum</i> ) | Eutremeae <sup>4</sup>            | 26349                      | 75                                                  | 5769                                                          | 21.9                     | (Yang et al., 2013)        |
| <i>Thellungiella parvula</i> ( <i>Schrenkiella parvula</i> ) | Eutremeae                         | 25655                      | 75                                                  | 5614                                                          | 21.9                     | (Dassanayake et al., 2011) |
| <i>Thlaspi arvense</i>                                       | Thlaspidaceae <sup>4</sup>        | 27389                      | 70                                                  | 6318                                                          | 23.1                     | (Dorn et al., 2013)        |
| <i>Aethionema arabicum</i>                                   | Aethionemeae <sup>5</sup>         | 37722                      | 77                                                  | 7560                                                          | 20.0                     | (Haudry et al., 2013)      |

728 <sup>1</sup>Taxonomic classification according to Franzke et al. (2011); <sup>2</sup>Count of protein encoding gene IDs for  
 729 which 500 bp upstream regions were extracted; <sup>3</sup>Lineage I of Brassicaceae; <sup>4</sup>expanded lineage II of  
 730 Brassicaceae; <sup>5</sup>lineage basal to the major three Brassicaceae lineages.

731

732

733 **Table 3.** Pathway and GO term enrichment for 915 *A. thaliana* genes for which the AW-box is  
 734 significantly over-represented in upstream regions of ortholog gene sets. GO term analysis was  
 735 performed using the DAVID online resource (Huang da et al., 2009), using the *A. thaliana* genes that  
 736 identify the 25545 ortholog gene sets as background. Enrichment analysis for ARALIP lipid metabolic  
 737 pathways (Li-Beisson et al., 2013), metabolic pathway categories of metabolic model Bna572 (Hay et al.,  
 738 2014) and the MapMan classification system (Usadel et al., 2009) was performed as described in  
 739 methods. All results with overrepresentation and a  $p$ -value  $< 0.05$  are listed. For Mapman enrichment  
 740 analysis only level 1 and 2 results are reported. See also Supplemental Table S3.

| classification system  | Term / pathway                                                | Expectatio<br>n value | Gene<br>count | Fold<br>Enrichme<br>nt | $p$ -value*         |
|------------------------|---------------------------------------------------------------|-----------------------|---------------|------------------------|---------------------|
| Aralip                 | Fatty Acid Synthesis                                          | 1.86                  | 24            | 12.9                   | $4 \times 10^{-14}$ |
| Aralip                 | Triacylglycerol Biosynthesis                                  | 2.72                  | 9             | 3.3                    | $4 \times 10^{-2}$  |
| GO: Biological Process | glycolytic process (GO:0006096)                               | 2.69                  | 17            | 6.3                    | $6 \times 10^{-6}$  |
| GO: Biological Process | fatty acid biosynthetic process<br>(GO:0006633)               | 4.77                  | 22            | 4.6                    | $9 \times 10^{-6}$  |
| Bna572                 | fatty acid synthesis                                          | 3.12                  | 21            | 6.7                    | $2 \times 10^{-10}$ |
| Bna572                 | glycolysis                                                    | 3.33                  | 19            | 5.7                    | $5 \times 10^{-8}$  |
| MapMan                 | lipid metabolism.FA synthesis<br>and FA elongation (bin 11.1) | 3.51                  | 24            | 6.8                    | $1 \times 10^{-11}$ |
| MapMan                 | Glycolysis (bin 4)                                            | 2.54                  | 13            | 5.1                    | $4 \times 10^{-5}$  |
| MapMan                 | TCA / org transformation (bin 8)                              | 2.72                  | 10            | 3.7                    | $1 \times 10^{-2}$  |
| MapMan                 | lipid metabolism (bin 11)                                     | 15.0                  | 36            | 2.4                    | $5 \times 10^{-5}$  |

741 \*Adjusted  $p$ -value (Bonferroni correction).

742

743

744

745 **Table 4.** Examples of putative direct *A. thaliana* WRI1 regulatory gene targets identified by the workflow  
 746 shown in Fig. 1. Sequence logos are shown in Supplemental Fig. S4. All discovered gene targets, AW-box  
 747 sequences and further details shown in Supplemental Table S5.

| Gene abbreviation (description, gene ID)                                                      | <i>p</i> -value for enrichment of AW-box across orthologs | Number of <i>in-vitro</i> binding AW-box sites ( <i>A. thaliana</i> ) | WRI1 dissociation constant <sup>1</sup> [nM] | Gene expression correlation with WRI1 <sup>2</sup> | species conservation ratio <sup>3</sup> |
|-----------------------------------------------------------------------------------------------|-----------------------------------------------------------|-----------------------------------------------------------------------|----------------------------------------------|----------------------------------------------------|-----------------------------------------|
| ACBP6 (ACYL-COA-BINDING PROTEIN 6, AT1G31812)                                                 | 2 x 10 <sup>-7</sup>                                      | 1                                                                     | 7.9 ± 1.0                                    | 0.64*                                              | 0.92                                    |
| BADC1 (Biotin/lipoyl Attachment Domain Containing, AT3G56130)                                 | 2 x 10 <sup>-9</sup>                                      | 1                                                                     | 0.6 ± 0.2                                    | 0.69*                                              | 0.83                                    |
| BADC2 (Biotin/lipoyl Attachment Domain Containing, AT1G52670)                                 | 3 x 10 <sup>-6</sup>                                      | 1                                                                     | 5.7 ± 2.6                                    | 0.83**                                             | 0.67                                    |
| BADC3 (Biotin/lipoyl Attachment Domain Containing, AT3G15690)                                 | 2 x 10 <sup>-5</sup>                                      | 1                                                                     | 9.5 ± 3.1                                    | 0.80**                                             | 0.67                                    |
| BC (Biotin Carboxylase, AT5G35360)                                                            | 1 x 10 <sup>-5</sup>                                      | 1                                                                     | 0.2 ± 0.2                                    | 0.79**                                             | 0.42                                    |
| BCA5 (beta carbonic anhydrase 5, AT4G33580)                                                   | 5 x 10 <sup>-11</sup>                                     | 1                                                                     | 0.6 ± 0.5                                    | 0.72*                                              | 1.00                                    |
| BCCP1 (Biotin Carboxyl Carrier Protein 1, AT5G16390)                                          | 5 x 10 <sup>-9</sup>                                      | 1                                                                     | 62.2 ± 19.5                                  | 0.61                                               | 0.92                                    |
| BCCP2 (Biotin Carboxyl Carrier Protein 2, AT5G15530)                                          | 2 x 10 <sup>-8</sup>                                      | 2                                                                     | 0.7 ± 0.3                                    | 0.86**                                             | 1.00                                    |
| bZIP67 (Basic-leucine zipper transcription factor family protein, AT3G44460)                  | 4 x 10 <sup>-9</sup>                                      | 1                                                                     | 0.03 ± 0.04                                  | 0.57                                               | 1.00                                    |
| CT-α (Carboxyltransferase α-subunit, AT2G38040)                                               | 1 x 10 <sup>-11</sup>                                     | 1                                                                     | 70.2 ± 9.4                                   | 0.86**                                             | 1.00                                    |
| DGAT2 (Diacylglycerol acyltransferase 2, AT3G51520)                                           | 5 x 10 <sup>-9</sup>                                      | 1                                                                     | 39.0 ± 9.1                                   | 0.80**                                             | 0.92                                    |
| ENO1 (Enolase, AT1G74030) <sup>(p)</sup>                                                      | 5 x 10 <sup>-10</sup>                                     | 1                                                                     | 10.3 ± 6.7                                   | 0.84**                                             | 0.92                                    |
| ENO2 (Enolase, AT2G36530) <sup>(c)</sup>                                                      | 5 x 10 <sup>-6</sup>                                      | 1                                                                     | 13.4 ± 3.7                                   | 0.57                                               | 0.92                                    |
| FRK3 (Fructokinase, AT1G66430) <sup>(p)</sup>                                                 | 1 x 10 <sup>-9</sup>                                      | 1                                                                     | 85.2 ± 32.8                                  | 0.64*                                              | 0.92                                    |
| GPDHC1 (glycerol-3-phosphate dehydrogenase, AT2G41540) <sup>(c)</sup>                         | 5 x 10 <sup>-11</sup>                                     | 1                                                                     | 81.7 ± 15.5                                  | 0.23                                               | 0.92                                    |
| GPDHC1 (glycerol-3-phosphate dehydrogenase, AT3G07690) <sup>(c)</sup>                         | 7 x 10 <sup>-8</sup>                                      | 1                                                                     | 105.2 ± 30.8                                 | 0.79**                                             | 0.83                                    |
| KASI (Ketoacyl-ACP Synthase I, AT5G46290)                                                     | 3 x 10 <sup>-11</sup>                                     | 2                                                                     | 1.7 ± 1.2                                    | 0.84**                                             | 1.00                                    |
| LEC1 (Leafy Cotyledon 1, AT1G21970)                                                           | 2 x 10 <sup>-7</sup>                                      | 1                                                                     | 4.3 ± 1.4                                    | 0.92**                                             | 0.75                                    |
| PFP-β (pyrophosphate dependent phospho-fructokinase <sup>(c)</sup> β-subunit, AT1G12000)      | 4 x 10 <sup>-10</sup>                                     | 1                                                                     | 53.9 ± 12.0                                  | 0.67*                                              | 0.92                                    |
| PGI1 (phosphoglucose isomerase, AT4G24620) <sup>(p)</sup>                                     | 4 x 10 <sup>-5</sup>                                      | 1                                                                     | 2.9 ± 0.6                                    | 0.63*                                              | 0.92                                    |
| PGLM1 (phosphoglyceromutase, AT1G22170) <sup>(p)</sup>                                        | 7 x 10 <sup>-6</sup>                                      | 1                                                                     | 1.9 ± 1.3                                    | 0.91**                                             | 0.75                                    |
| PGLM2 (phosphoglyceromutase, AT1G78050) <sup>(p)</sup>                                        | 1 x 10 <sup>-9</sup>                                      | 2                                                                     | 6.7 ± 4.1                                    | 0.87**                                             | 1.00                                    |
| PII (PII/GLNB1 homolog, AT4G01900) <sup>(p)</sup>                                             | 2 x 10 <sup>-10</sup>                                     | 2                                                                     | 9.6 ± 4.1                                    | 0.83**                                             | 1.00                                    |
| PK <sub>p</sub> -β <sub>1</sub> (Plastidic pyruvate kinase β <sub>1</sub> subunit, AT5G52920) | 1 x 10 <sup>-11</sup>                                     | 2                                                                     | 12.2 ± 6.9                                   | 0.88**                                             | 1.00                                    |
| PK <sub>p</sub> α (Pyruvate kinase α-subunit, AT3G22960) <sup>(p)</sup>                       | 1 x 10 <sup>-14</sup>                                     | 1                                                                     | 0.6 ± 0.3                                    | 0.89**                                             | 1.00                                    |
| ROD1 (REDUCED OLEATE DESATURATION 1, AT3G15820)                                               | 3 x 10 <sup>-5</sup>                                      | 1                                                                     | 2.4 ± 0.3                                    | 0.70*                                              | 0.92                                    |
| SUS2 (Sucrose synthase 2, AT5G49190)                                                          | 3 x 10 <sup>-5</sup>                                      | 1                                                                     | 12.6 ± 11.5                                  | 0.74*                                              | 0.92                                    |
| TPI (Triose phosphate isomerase, AT3G55440) <sup>(c)</sup>                                    | 2 x 10 <sup>-9</sup>                                      | 1                                                                     | 76.2 ± 22.2 <sup>4</sup>                     | 0.59                                               | 0.92                                    |

748 <sup>1</sup> For multiple AW-sites per *A. thaliana* gene locus, the lowest measured *k<sub>d</sub>* value is reported here (mean ± SD, *n* =  
 749 3). <sup>2</sup>Pearson correlation coefficients for co-expression with WRI1 across 8 seed developmental stages in *A. thaliana*  
 750 (Schmid et al., 2005). <sup>3</sup> number of species for which an *in-vitro* binding AW-site is conserved / total number of  
 751 species. <sup>4</sup>consensus “(T/C)CTCGTGATC(AG)TCG” is conserved across 19 sequences (some non-canonical AW-sites).  
 752 <sup>(c)</sup>Cytosolic compartment isoform; <sup>(p)</sup>plastidic compartment isoform. \*, \*\*Positive correlation (\**p* < 0.05, \*\**p* < 0.01;  
 753 *n*=8, one-sided test).  
 754

755 **Table 5.** Examples of additional putative direct gene targets of WRI1, examined since being relevant for  
 756 central carbon metabolism or seed development. Sequence logos are shown in Supplemental Fig. S5. All  
 757 discovered gene targets, AW-box sequences and further details shown in Supplemental Table S6.

| Gene abbreviation (description, gene ID)                                                                | <i>p</i> -value for enrichment of AW-box across orthologs | Number of <i>in-vitro</i> binding AW-box sites ( <i>A. thaliana</i> ) | WRI1 dissociation constant <sup>1</sup> [nM] | Gene expression correlation with WRI1 <sup>2</sup> | species conservation ratio <sup>3</sup> |
|---------------------------------------------------------------------------------------------------------|-----------------------------------------------------------|-----------------------------------------------------------------------|----------------------------------------------|----------------------------------------------------|-----------------------------------------|
| AIL6 (AINTEGUMENTA-like 6, AT5G10510)                                                                   | $8 \times 10^{-11}$                                       | 1                                                                     | $1.4 \pm 0.8$                                | 0.35                                               | 1.00                                    |
| CRU3 (cruciferin 3, AT4G28520)                                                                          | $3 \times 10^{-7}$                                        | 1                                                                     | $1.6 \pm 0.8$                                | 0.57                                               | 0.92                                    |
| GPD4 (glucose 6-phosphate dehydrogenase, AT1G09420) <sup>(p)</sup>                                      | $2 \times 10^{-3}$                                        | 1                                                                     | $8.2 \pm 4.5$                                | 0.87**                                             | 0.50                                    |
| GPT2 (glucose 6-phosphate/phosphate translocator, AT1G61800)                                            | $5 \times 10^{-5}$                                        | 1                                                                     | $1.6 \pm 0.82^4$                             | 0.92**                                             | 0.83                                    |
| L1L (Leafy Cotyledon1-Like, AT5G47670)                                                                  | $2 \times 10^{-6}$                                        | 1                                                                     | $10.5 \pm 1.0$                               | 0.97**                                             | 0.92                                    |
| PFP- $\alpha$ (pyrophosphate dependent phosphofructokinase $\alpha$ -subunit, AT1G76550) <sup>(c)</sup> | $3 \times 10^{-1}$                                        | 1                                                                     | $12.3 \pm 4.3^5$                             | 0.74*                                              | 0.92                                    |
| PGD1 (6-phosphogluconate dehydrogenase, AT1G64190) <sup>(c)(p)</sup>                                    | $2 \times 10^{-10}$                                       | 2                                                                     | $9.8 \pm 1.2$                                | 0.65*                                              | 0.83                                    |
| PGD3 (6-phosphogluconate dehydrogenase, AT5G41670) <sup>(c)(p)</sup>                                    | $5 \times 10^{-10}$                                       | 1                                                                     | $9.8 \pm 1.2$                                | 0.72*                                              | 0.67                                    |
| PGLCT (plastidic glucose translocator, AT5G16150)                                                       | $2 \times 10^{-10}$                                       | 1                                                                     | $23.9 \pm 4.7$                               | 0.75*                                              | 1.00                                    |
| PPT1 (phosphoenolpyruvate/phosphate translocator, AT5G33320)                                            | $3 \times 10^{-6}$                                        | 2                                                                     | $4.4 \pm 6.6$                                | 0.75*                                              | 0.50                                    |
| TA2 (transaldolase, AT5G13420) <sup>(p)</sup>                                                           | $2 \times 10^{-1}$                                        | 1                                                                     | $104 \pm 5.3^6$                              | 0.96**                                             | 0.92                                    |
| TKL1 (transketolase 1, AT3G60750) <sup>(p)</sup>                                                        | $3 \times 10^{-11}$                                       | 1                                                                     | $1.0 \pm 0.6$                                | 0.53                                               | 1.00                                    |

758 <sup>1</sup> For multiple AW-sites per *A. thaliana* gene locus, the lowest measured  $k_d$  value is reported here unless indicated  
 759 otherwise (mean  $\pm$  SD,  $n = 3$ ). <sup>2</sup> Pearson correlation coefficients for co-expression with WRI1 across 8 seed  
 760 developmental stages in *A. thaliana* (Schmid et al., 2005). <sup>3</sup> number of species for which an *in-vitro* binding AW-site  
 761 is conserved / total number of species. <sup>4</sup> Binding affinity given for AW-box canonical ortholog binding site in  
 762 *Theilungiella halophila*. 9 of 14 other homolog AW-sites bind while the non-canonical homolog site in *A. thaliana*  
 763 did not bind. <sup>5</sup> Consensus GGTGATCGTATCG conserved across 9 species (non-canonical AW-sites GNTNG(N)<sub>7</sub>CG).  
 764 <sup>6</sup> consensus "(T/C)(T/C)TTGGTTG(A/G)TCG" is conserved across 21 sequences (some non-canonical AW-sites).  
 765 <sup>(c)</sup>Cytosolic compartment isoform; <sup>(p)</sup>plastidic compartment isoform. \*,\*\*Positive correlation (\* $p < 0.05$ , \*\* $p < 0.01$ ;  
 766  $n=8$ , one-sided test).

767

768

769

## 770 **Figure legends**

771 **Figure 1.** Workflow describing the main strategy developed in this study for detection of conserved and  
772 *in-vitro* binding AW-box sites. The white arrow indicates manual curated analysis of AW-box  
773 conservation and *in-vitro* binding for 21 additional genes of interest, as mentioned in the text.

774 **Figure 2.** Distribution of DNA-WRI1 binding affinities for 90 AW-box sites found upstream of 73 likely  
775 WRI1 target genes in *A. thaliana*. The set of 73 *A. thaliana* genes was identified by pathway enrichment  
776 analysis (Table 3). Using Microscale thermophoresis, equilibrium dissociation constants ( $K_d$ ) were  
777 determined for 90 DNA targets, representing 95 putative WRI1 binding sites (AW-box sites) which are  
778 present upstream the genes. For sequence data and measurement values see Supplemental Table S4,  
779 measurements 1-86 and 189-192. Inset: Sequence logos of AW-box sites from measured DNA  
780 fragments, separated according to ranges of  $k_d$  values. Sequence logos were generated with WebLogo  
781 (Crooks et al., 2004).

782 **Figure 3.** Enrichment and conservation of the AW-box motif across ortholog upstream regions (OURs). A,  
783 Relative position and orientation of two AW-box sites in the 500 bp upstream regions *A. thaliana*  
784 plastidic pyruvate kinase  $\beta_1$ -subunit (AT5G52920) are conserved across orthologs. Although for three  
785 gene IDs (grey) no conserved AW sites were found, the two *A. thaliana* AW-sites are conserved across all  
786 12 species of this study. B, Sequence logos of the two conserved AW-box sites. C, Species conservation  
787 ratio for 53 genes for which at least one AW-site binds WRI1 ( $k_d < 200$  nM, Fig. 2). Abbreviations: Aa,  
788 *Aethionema arabicum*; At, *Arabidopsis thaliana*; Al, *Arabidopsis lyrata*; Bn, *Brassica napus*; Cs, *Camelina*  
789 *sativa*; Cg, *Capsella grandiflora*; Cr, *Capsella rubella*; Ch, *Cardamine hirsuta*; Lm, *Lepidium meyenii*; Th,  
790 *Thellungiella halophila*; Tp, *Thellungiella parvula*; Ta, *Thlaspi arvense*.

791 **Figure 4.** Phylogenetic and functional conservation of AW-box sites found in *A. thaliana* upstream  
792 regions. Sequence logos are shown for 5 *A. thaliana* sites that are conserved (upstream positions and  
793 directionalities in *A. thaliana* are indicated). A to C, AW-sites conserved within the 12 *Brassicaceae*  
794 species of this study. Analyzed by MST were 7 sequences for plastidic pyruvate kinase  $\beta_1$ -subunit (A), 5  
795 sequences for Biotin Carboxyl Carrier Protein 2 (B), 5 sequences for Ketoacyl-ACP Synthase 1 (C). D, 12  
796 sequences for AW-sites in 2,3-bisphosphoglycerate-dependent phosphoglycerate mutase (PGLM1,  
797 PGLM2) conserved within *Brassicaceae* species and outside were analyzed (see also Supplemental Table  
798 S7, Supplemental Fig. S6, 7). E, Box-plot showing the total range (black), interquartile range (blue) and  
799 median (red) of all 29  $k_d$  values obtained for analysis of DNA fragments in A to D. Aligned sequences and  
800  $k_d$  values can be found in Supplemental Table S5. Sequence logos were generated with WebLogo (Crooks  
801 et al., 2004).



802

803 **Figure 5.** Positional bias of AW-box sites that bind WRI1 *in-vitro* and co-expression analysis of associated  
804 genes. A, Positional distribution of WRI1 binding AW-boxes relative to the transcriptional start site (TSS)  
805 in *A. thaliana*. Grey bars: 62 AW-box sites identified to be binding WRI1 ( $k_d < 200$  nM, see Fig. 2). White  
806 bars: genomic background. B, Co-expression of *A. thaliana* genes with WRI1 during seed development.  
807 Pearson Correlation coefficients are based on gene expression data for 8 seed developmental stages  
808 taken from the AtGenExpress dataset (Schmid et al., 2005). Grey bars: correlation coefficients for 53  
809 genes for which at least one AW-box can bind WRI1 ( $k_d < 200$  nM, Fig. 2). White bars: genomic  
810 background.

811 **Figure 6.** Schematic of carbon allocation in developing seeds of *A. thaliana* with indication of 284 protein  
812 encoding genes, highlighting putative WRI1 gene targets with *in-vitro* functional AW-box sites and  
813 results on AW-box enrichment and conservation across species. Reactions and genes are identified in  
814 Supplemental Table S8. Reaction abbreviations: AAE15/16, Acyl:acyl carrier protein synthetase; ABCAT,  
815 ABC Acyl Transporter; ABCG4, ABC Transporter (cutin, wax); ACBP, acyl-CoA-binding protein; ACP, Acyl  
816 Carrier Protein;  $\alpha/\beta$ -CT, acetyl-CoA carboxylase carboxyltransferase alpha/beta subunit; ALDH, non-  
817 phosphorylating Glyceraldehyde 3-phosphate dehydrogenase; BADC, biotin/lipoyl attachment domain  
818 containing; BASS2, Sodium Bile acid symporter family protein; BC, Biotin Carboxylase of Heteromeric  
819 ACCase; BCA5, beta carbonic anhydrase 5; BCCP, Biotin Carboxyl Carrier Protein; DGAT, Acyl-CoA :  
820 Diacylglycerol Acyltransferase; DHLAT, Dihydrolipoamide Acetyltransferase; ECR, Enoyl-CoA Reductase;  
821 Eno, Enolase; ENR, Enoyl-ACP Reductase ; FAB2, Stearoyl-ACP Desaturase; FAD2/3, oleate/linoleate  
822 desaturase; FAT, Acyl-ACP Thioesterase; FAX1, Fatty Acid Export 1; FBA, fructose bisphosphate aldolase;  
823 FRK, fructokinase; G6PD, glucose 6-phosphate dehydrogenase; GAPDH, Glyceraldehyde 3-phosphate  
824 dehydrogenase; GPAT, Glycerol-3-Phosphate Acyltransferase; GPDH, NAD- glycerol-3-phosphate  
825 dehydrogenase; HACD, Very-long-chain (3R)-3-hydroxyacyl-CoA dehydratase; HACPS, Holo-ACP  
826 Synthase; HAD, Hydroxyacyl-ACP Dehydratase; HKX, hexokinase; INV, invertase; KAR, Ketoacyl-ACP  
827 Reductase ; KAS, Ketoacyl-ACP Synthase; KCR, beta-ketoacyl reductase; KCS, 3-ketoacyl-CoA synthase;  
828 LACS, Long-Chain Acyl-CoA Synthetase; LPAAT, 1-acylglycerol-3-phosphate acyltransferase; LPCAT, 1-  
829 acylglycerol-3-phosphocholine Acyltransferase; LPD, Dihydrolipoamide Dehydrogenase; LS, Lipoate  
830 synthase; LT, Lipoyltransferase; MCMT, Malonyl-CoA : ACP Malonyltransferase; NTT, nucleoside  
831 triphosphate transporter; PDAT, Phospholipid : Diacylglycerol Acyltransferase; PDCT,  
832 Phosphatidylcholine:diacylglycerol cholinephosphotransferase; PDH-E1 $\alpha$ , E1- $\alpha$  component of Pyruvate  
833 Dehydrogenase Complex; PDH-E1 $\beta$ , E1-  $\beta$  component of Pyruvate Dehydrogenase Complex; PEPC,

834 phosphoenolpyruvate carboxylase; PFK, phosphofructokinase; PFP, pyrophosphate dependent  
835 phosphofructokinase; PGD, 6-phosphogluconate dehydrogenase; PGI, phosphoglucose isomerase; PGK,  
836 Phosphoglycerokinase; PGL, 6-phosphogluconolactonase; PGLCT, plastidic glucose translocator; PGM,  
837 phosphoglucomutase; PGL, 6-phosphogluconolactonase; PGLM, phosphoglyceromutase; PII, regulatory  
838 subunit of acetyl-CoA carboxylase; PK, pyruvate kinase; PLA, Phospholipase A2; PP, Diacylglycerol-  
839 Pyrophosphate Phosphatase; PPK, pyruvate orthophosphate dikinase; PPT,  
840 phosphoenolpyruvate/phosphate antiport; PRK, phosphoribulokinase ; RPE, ribulose-5-phosphate-3-  
841 epimerase; RPI, ribose-5-phosphate isomerase; RubisC, ribulose biphosphate carboxylase; SAD,  
842 Stearoyl-ACP desaturase;  $\beta$ -CT, Carboxyltransferase (Subunit of Heteromeric ACCase); SPP, sucrose-6-  
843 phosphate phosphohydrolase; SPS, sucrose phosphate synthase; SUS, sucrose synthase; TKL,  
844 transketolase; TPI, Triose phosphate isomerase; TPT, triosephosphate/phosphate antiport; UGP, UDP-  
845 glucose pyrophosphorylase; XPT, cyulose 5-phosphate / phosphate translocator. Metabolites  
846 abbreviations: 1,3BPGA, ;2PGA, 2-phosphoglyceric acid; 3PGA, 3-phosphoglyceric acid; DHAP,  
847 dihydroxyacetone phosphate; E4P, erythrose 4-phosphate; F1,6BP, fructose 1,6 bis-phosphate; F6P,  
848 fructose 6-phosphate; Fru, fructose ; G1P, glucose 1-phosphate; G6P, glucose 6-phosphate; GAP,  
849 glyceraldehyde 3-phosphate; Glc, glucose; PEP, phosphoenol pyruvate; R5P, ribulose 5-phosphate; RBP,  
850 ribulose biphosphate; Ru5P, ribulose 5-phosphate; Suc6P, sucrose 6-phosphate.

851

852

853

854 Figures

855

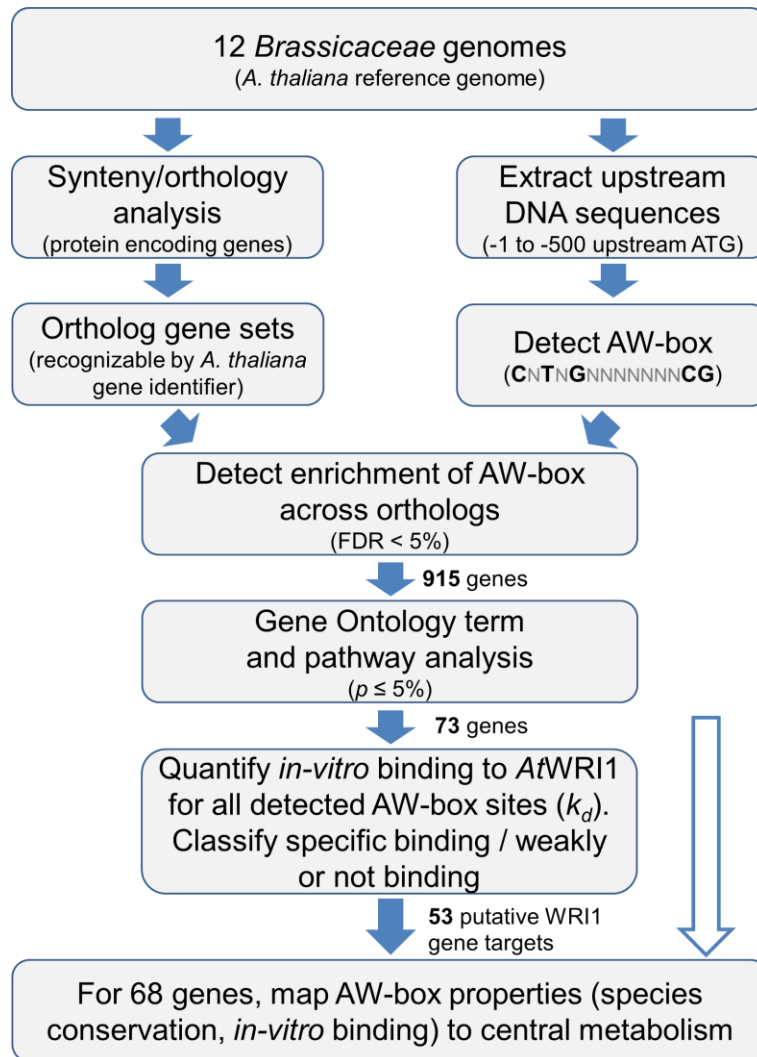

856

857 **Figure 1.** Workflow describing the main strategy developed in this study for detection of conserved and  
858 *in-vitro* binding AW-box sites. The white arrow indicates manual curated analysis of AW-box  
859 conservation and *in-vitro* binding for 21 additional genes of interest, as mentioned in the text.

860

861

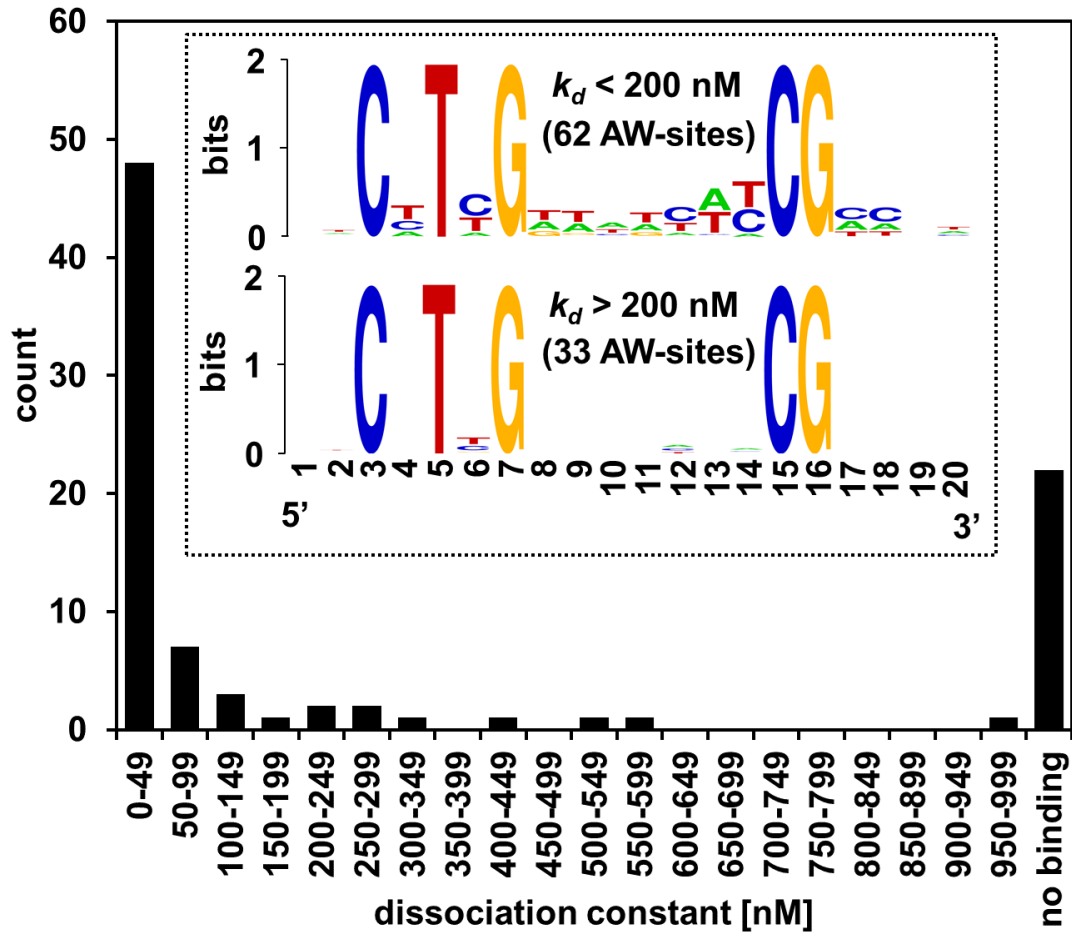

862

863 **Figure 2.** Distribution of DNA-WRI1 binding affinities for 90 AW-box sites found upstream of 73 likely  
864 WRI1 target genes in *A. thaliana*. The set of 73 *A. thaliana* genes was identified by pathway enrichment  
865 analysis (Table 3). Using Microscale thermophoresis, equilibrium dissociation constants ( $K_d$ ) were  
866 determined for 90 DNA targets, representing 95 putative WRI1 binding sites (AW-box sites) which are  
867 present upstream the genes. For sequence data and measurement values see Supplemental Table S4,  
868 measurements 1-86 and 189-192. Inset: Sequence logos of AW-box sites from measured DNA  
869 fragments, separated according to ranges of  $k_d$  values. Sequence logos were generated with WebLogo  
870 (Crooks et al., 2004).

871

872

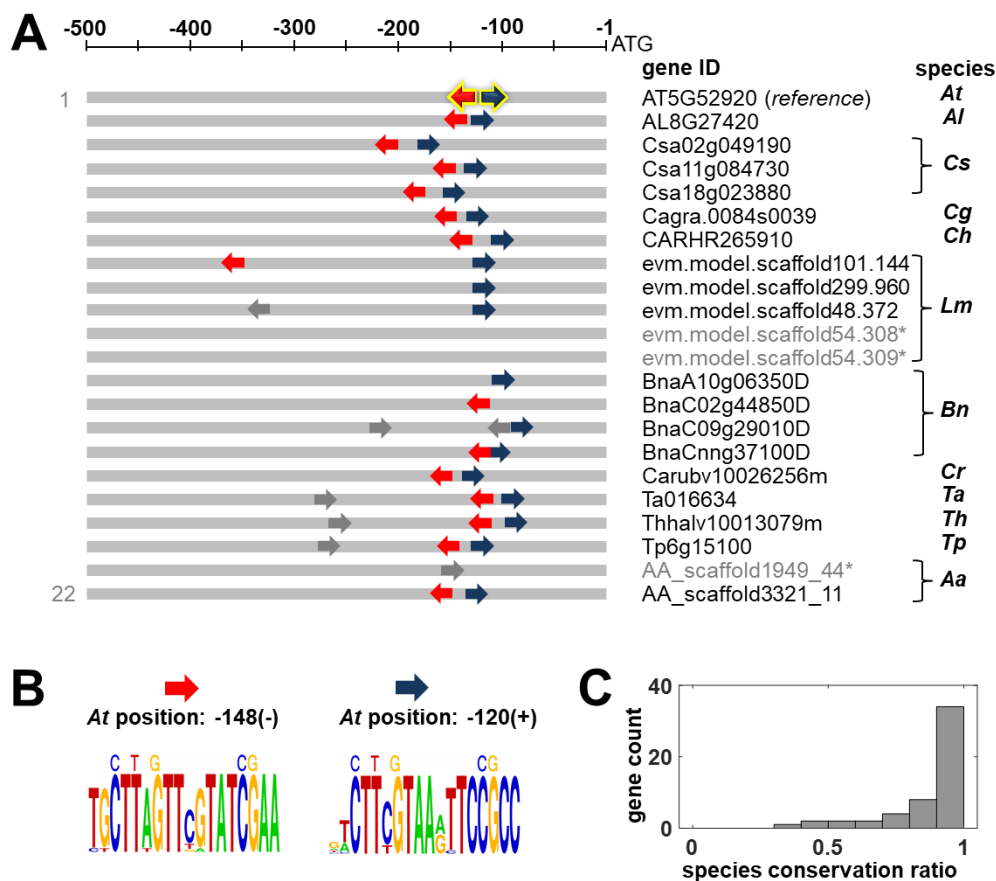

873

874 **Figure 3.** Enrichment and conservation of the AW-box motif across ortholog upstream regions (OURs). A,  
 875 Relative position and orientation of two AW-box sites in the 500 bp upstream regions *A. thaliana*  
 876 plastidic pyruvate kinase  $\beta_1$ -subunit (AT5G52920) are conserved across orthologs. Although for three  
 877 gene IDs (grey) no conserved AW sites were found, the two *A. thaliana* AW-sites are conserved across all  
 878 12 species of this study. B, Sequence logos of the two conserved AW-box sites. C, Species conservation  
 879 ratio for 53 genes for which at least one AW-site binds WRI1 ( $k_d < 200$  nM, Fig. 2). Abbreviations: Aa,  
 880 *Aethionema arabicum*; At, *Arabidopsis thaliana*; Al, *Arabidopsis lyrata*; Bn, *Brassica napus*; Cs, *Camelina*  
 881 *sativa*; Cg, *Capsella grandiflora*; Cr, *Capsella rubella*; Ch, *Cardamine hirsuta*; Lm, *Lepidium meyenii*; Th,  
 882 *Thellungiella halophila*; Tp, *Thellungiella parvula*; Ta, *Thlaspi arvense*.

883

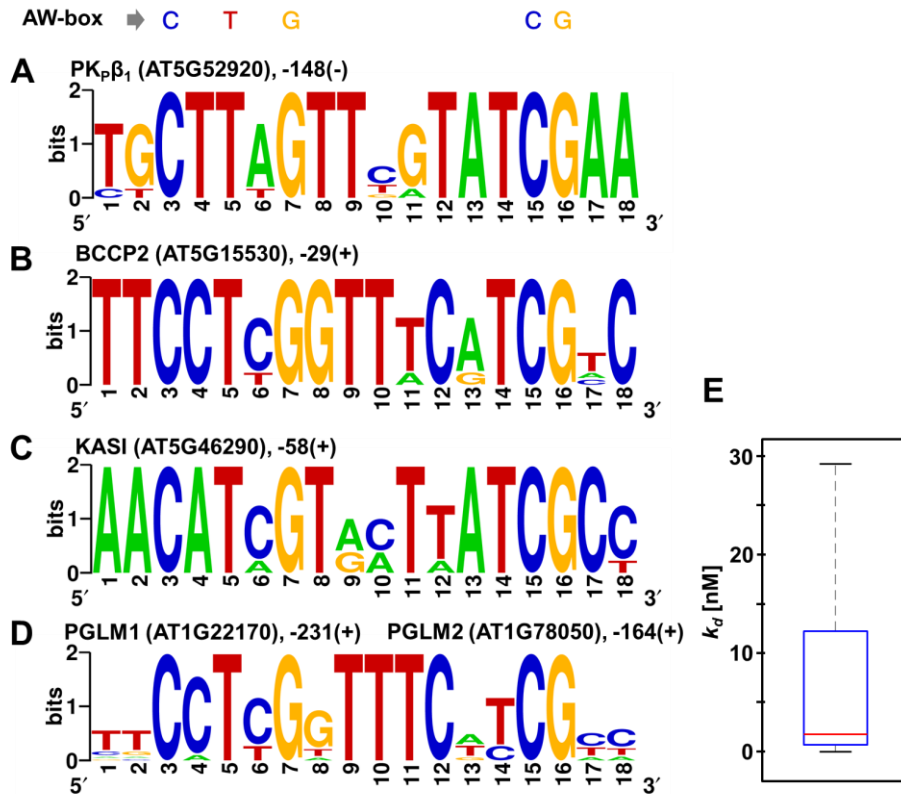

884

885 **Figure 4.** Phylogenetic and functional conservation of AW-box sites found in *A. thaliana* upstream  
 886 regions. Sequence logos are shown for 5 *A. thaliana* sites that are conserved (upstream positions and  
 887 directionalities in *A. thaliana* are indicated). A to C, AW-sites conserved within the 12 *Brassicaceae*  
 888 species of this study. Analyzed by MST were 7 sequences for plastidic pyruvate kinase β<sub>1</sub>-subunit (A), 5  
 889 sequences for Biotin Carboxyl Carrier Protein 2 (B), 5 sequences for Ketoacyl-ACP Synthase 1 (C). D, 12  
 890 sequences for AW-sites in 2,3-bisphosphoglycerate-dependent phosphoglycerate mutase (PGLM1,  
 891 PGLM2) conserved within *Brassicaceae* species and outside were analyzed (see also Supplemental Table  
 892 S7, Supplemental Fig. S6, 7). E, Box-plot showing the total range (black), interquartile range (blue) and  
 893 median (red) of all 29 *k<sub>d</sub>* values obtained for analysis of DNA fragments in A to D. Aligned sequences and  
 894 *k<sub>d</sub>* values can be found in Supplemental Table S5. Sequence logos were generated with WebLogo (Crooks  
 895 et al., 2004).

896

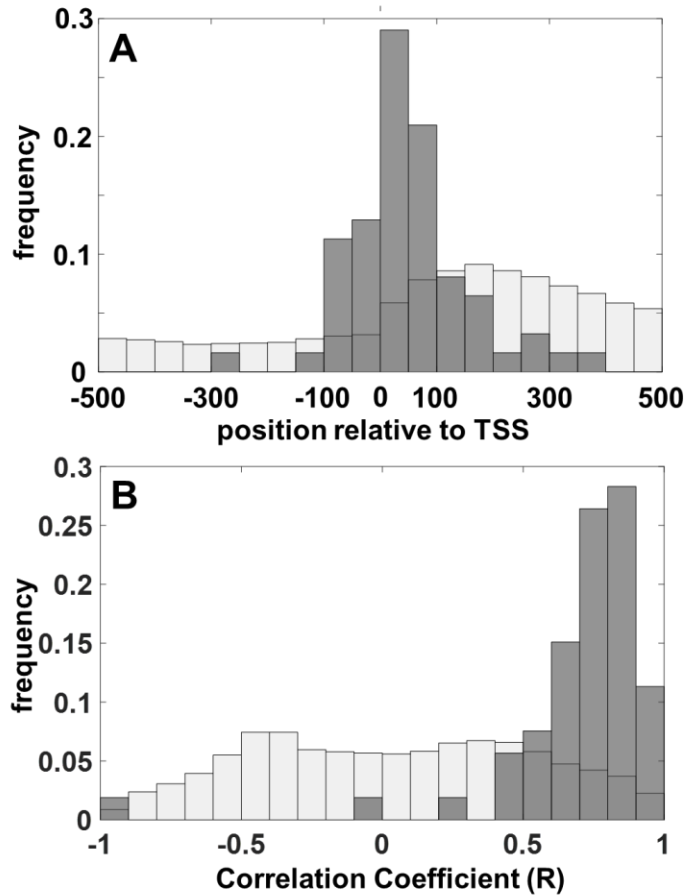

897

898 **Figure 5.** Positional bias of AW-box sites that bind WRI1 *in-vitro* and co-expression analysis of associated  
899 genes. A, Positional distribution of WRI1 binding AW-boxes relative to the transcriptional start site (TSS)  
900 in *A. thaliana*. Grey bars: 62 AW-box sites identified to be binding WRI1 ( $k_d < 200$  nM, see Fig. 2). White  
901 bars: genomic background. B, Co-expression of *A. thaliana* genes with WRI1 during seed development.  
902 Pearson Correlation coefficients are based on gene expression data for 8 seed developmental stages  
903 taken from the AtGenExpress dataset (Schmid et al., 2005). Grey bars: correlation coefficients for 53  
904 genes for which at least one AW-box can bind WRI1 ( $k_d < 200$  nM, Fig. 2). White bars: genomic  
905 background.



906

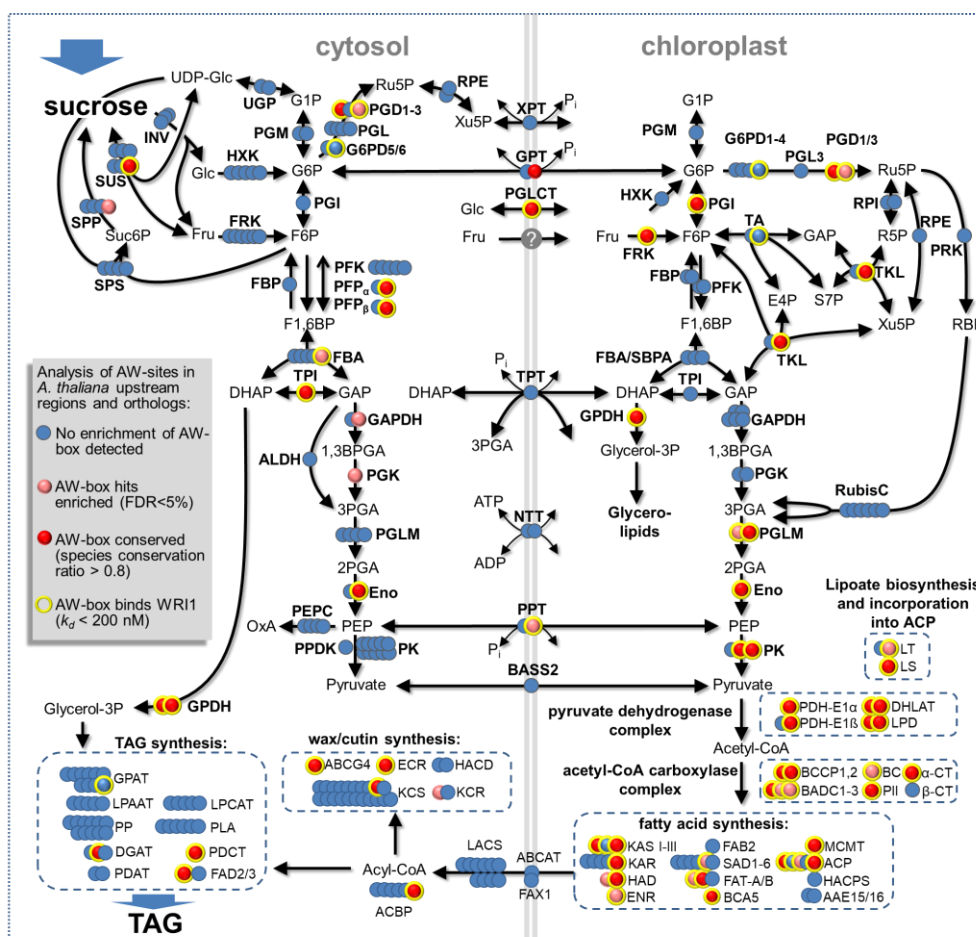

907

908 **Figure 6.** Schematic of carbon allocation in developing seeds of *A. thaliana* with indication of 284 protein  
 909 encoding genes, highlighting putative WR11 gene targets with *in-vitro* functional AW-box sites and  
 910 results on AW-box enrichment and conservation across species. Reactions and genes are identified in  
 911 Supplemental Table S8. Reaction abbreviations: AAE15/16, Acyl:acyl carrier protein synthetase; ABCAT,  
 912 ABC Acyl Transporter; ABCG4, ABC Transporter (cutin, wax); ACBP, acyl-CoA-binding protein; ACP, Acyl  
 913 Carrier Protein;  $\alpha/\beta$ -CT, acetyl-CoA carboxylase carboxyltransferase alpha/beta subunit; ALDH, non-  
 914 phosphorylating Glyceraldehyde 3-phosphate dehydrogenase; BADC, biotin/lipoyl attachment domain  
 915 containing; BASS2, Sodium Bile acid symporter family protein; BC, Biotin Carboxylase of Heteromeric  
 916 ACCase; BCA5, beta carbonic anhydrase 5; BCCP, Biotin Carboxyl Carrier Protein; DGAT, Acyl-CoA :  
 917 Diacylglycerol Acyltransferase; DHLAT, Dihydrolipoamide Acetyltransferase; ECR, Enoyl-CoA Reductase;  
 918 Eno, Enolase; ENR, Enoyl-ACP Reductase; FAB2, Stearoyl-ACP Desaturase; FAD2/3, oleate/linoleate  
 919 desaturase; FAT, Acyl-ACP Thioesterase; FAX1, Fatty Acid Export 1; FBA, fructose biphosphate aldolase;  
 920 FRK, fructokinase; G6PD, glucose 6-phosphate dehydrogenase; GAPDH, Glyceraldehyde 3-phosphate  
 921 dehydrogenase; GPAT, Glycerol-3-Phosphate Acyltransferase; GPDH, NAD- glycerol-3-phosphate  
 922 dehydrogenase; HACD, Very-long-chain (3R)-3-hydroxyacyl-CoA dehydratase; HACPS, Holo-ACP  
 923 Synthase; HAD, Hydroxyacyl-ACP Dehydratase; HXK, hexokinase; INV, invertase; KAR, Ketoacyl-ACP



924 Reductase ; KAS, Ketoacyl-ACP Synthase; KCR, beta-ketoacyl reductase; KCS, 3-ketoacyl-CoA synthase;  
925 LACS, Long-Chain Acyl-CoA Synthetase; LPAAT, 1-acylglycerol-3-phosphate acyltransferase; LPCAT, 1-  
926 acylglycerol-3-phosphocholine Acyltransferase; LPD, Dihydrolipoamide Dehydrogenase; LS, Lipoate  
927 synthase; LT, Lipoyltransferase; MCMT, Malonyl-CoA : ACP Malonyltransferase; NTT, nucleoside  
928 triphosphate transporter; PDAT, Phospholipid : Diacylglycerol Acyltransferase; PDCT,  
929 Phosphatidylcholine:diacylglycerol cholinephosphotransferase; PDH-E1 $\alpha$ , E1- $\alpha$  component of Pyruvate  
930 Dehydrogenase Complex; PDH-E1 $\beta$ , E1-  $\beta$  component of Pyruvate Dehydrogenase Complex; PEPC,  
931 phosphoenolpyruvate carboxylase; PFK, phosphofructokinase; PFP, pyrophosphate dependent  
932 phosphofructokinase; PGD, 6-phosphogluconate dehydrogenase; PGI, phosphoglucose isomerase; PGK,  
933 Phosphoglycerokinase; PGL, 6-phosphogluconolactonase; PGLCT, plastidic glucose translocator; PGM,  
934 phosphoglucomutase; PGL, 6-phosphogluconolactonase; PGLM, phosphoglyceromutase; PII, regulatory  
935 subunit of acetyl-CoA carboxylase; PK, pyruvate kinase; PLA, Phospholipase A2; PP, Diacylglycerol-  
936 Pyrophosphate Phosphatase; PPK, pyruvate orthophosphate dikinase; PPT,  
937 phosphoenolpyruvate/phosphate antiport; PRK, phosphoribulokinase ; RPE, ribulose-5-phosphate-3-  
938 epimerase; RPI, ribose-5-phosphate isomerase; RubisC, ribulose bisphosphate carboxylase; SAD,  
939 Stearoyl-ACP desaturase;  $\beta$ -CT, Carboxyltransferase (Subunit of Heteromeric ACCase); SPP, sucrose-6-  
940 phosphate phosphohydrolase; SPS, sucrose phosphate synthase; SUS, sucrose synthase; TKL,  
941 transketolase; TPI, Triose phosphate isomerase; TPT, triosephosphate/phosphate antiport; UGP, UDP-  
942 glucose pyrophosphorylase; XPT, cylulose 5-phosphate / phosphate translocator. Metabolites  
943 abbreviations: 1,3BPGA, ;2PGA, 2-phosphoglyceric acid; 3PGA, 3-phosphoglyceric acid; DHAP,  
944 dihydroxyacetone phosphate; E4P, erythrose 4-phosphate; F1,6BP, fructose 1,6 bis-phosphate; F6P,  
945 fructose 6-phosphate; Fru, fructose ; G1P, glucose 1-phosphate; G6P, glucose 6-phosphate; GAP,  
946 glyceraldehyde 3-phosphate; Glc, glucose; PEP, phosphoenol pyruvate; R5P, ribulose 5-phosphate; RBP,  
947 ribulose bisphosphate; Ru5P, ribulose 5-phosphate; Suc6P, sucrose 6-phosphate.

948

949

950

951

952

953 **LITERATURE CITED**

- 954 **Adhikari ND, Bates PD, Browse J** (2016) WRINKLED1 Rescues Feedback Inhibition of Fatty Acid Synthesis  
955 in Hydroxylase-Expressing Seeds. *Plant Physiol* **171**: 179-191
- 956 **Altschul SF, Madden TL, Schaffer AA, Zhang J, Zhang Z, Miller W, Lipman DJ** (1997) Gapped BLAST and  
957 PSI-BLAST: a new generation of protein database search programs. *Nucleic Acids Res* **25**: 3389-  
958 3402
- 959 **Andriotis VM, Kruger NJ, Pike MJ, Smith AM** (2010a) Plastidial glycolysis in developing Arabidopsis  
960 embryos. *The New phytologist* **185**: 649-662
- 961 **Andriotis VM, Pike MJ, Bunnewell S, Hills MJ, Smith AM** (2010b) The plastidial glucose-6-  
962 phosphate/phosphate antiporter GPT1 is essential for morphogenesis in Arabidopsis embryos.  
963 *Plant J* **64**: 128-139
- 964 **Andriotis VM, Pike MJ, Kular B, Rawsthorne S, Smith AM** (2010c) Starch turnover in developing oilseed  
965 embryos. *The New phytologist* **187**: 791-804
- 966 **Bahaji A, Almagro G, Ezquer I, Gamez-Arcas S, Sanchez-Lopez AM, Munoz FJ, Barrio RJ, Sampedro MC,  
967 De Diego N, Spichal L, Dolezal K, Tarkowska D, Caporali E, Mendes MA, Baroja-Fernandez E,  
968 Pozueta-Romero J** (2018) Plastidial Phosphoglucose Isomerase Is an Important Determinant of  
969 Seed Yield through Its Involvement in Gibberellin-Mediated Reproductive Development and  
970 Storage Reserve Biosynthesis in Arabidopsis. *Plant Cell* **30**: 2082-2098
- 971 **Bailey TL, Boden M, Buske FA, Frith M, Grant CE, Clementi L, Ren J, Li WW, Noble WS** (2009) MEME  
972 SUITE: tools for motif discovery and searching. *Nucleic Acids Res* **37**: W202-208
- 973 **Baud S, Graham IA** (2006) A spatiotemporal analysis of enzymatic activities associated with carbon  
974 metabolism in wild-type and mutant embryos of *Arabidopsis* using in situ histochemistry. *Plant J*  
975 **46**: 155-169
- 976 **Baud S, Lepiniec L** (2008) Regulation of de novo fatty acid synthesis in maturing oilseeds of *Arabidopsis*.  
977 *Plant Physiol Biochem* **47**: 448-455
- 978 **Baud S, Lepiniec L** (2009) Regulation of de novo fatty acid synthesis in maturing oilseeds of Arabidopsis.  
979 *Plant physiology and biochemistry* **47**: 448-455
- 980 **Baud S, Mendoza MS, To A, Harscoet E, Lepiniec L, Dubreucq B** (2007) WRINKLED1 specifies the  
981 regulatory action of LEAFY COTYLEDON2 towards fatty acid metabolism during seed maturation  
982 in *Arabidopsis*. *Plant J* **50**: 825-838
- 983 **Baud S, Wuilleme S, To A, Rochat C, Lepiniec L** (2009) Role of WRINKLED1 in the transcriptional  
984 regulation of glycolytic and fatty acid biosynthetic genes in Arabidopsis. *The Plant journal* **60**:  
985 933-947
- 986 **Cernac A, Benning C** (2004) WRINKLED1 encodes an AP2/EREB domain protein involved in the control of  
987 storage compound biosynthesis in *Arabidopsis*. *Plant J* **40**: 575-585
- 988 **Chalhoub B, Denoeud F, Liu S, Parkin IA, Tang H, Wang X, Chiquet J, Belcram H, Tong C, Samans B,  
989 Correa M, Da Silva C, Just J, Falentin C, Koh CS, Le Clainche I, Bernard M, Bento P, Noel B,  
990 Labadie K, Alberti A, Charles M, Arnaud D, Guo H, Daviaud C, Alamery S, Jabbari K, Zhao M,  
991 Edger PP, Chelaifa H, Tack D, Lassalle G, Mestiri I, Schnell N, Le Paslier MC, Fan G, Renault V,  
992 Bayer PE, Golicz AA, Manoli S, Lee TH, Thi VH, Chalabi S, Hu Q, Fan C, Tollenaere R, Lu Y,  
993 Battail C, Shen J, Sidebottom CH, Wang X, Canaguier A, Chauveau A, Berard A, Deniot G, Guan  
994 M, Liu Z, Sun F, Lim YP, Lyons E, Town CD, Bancroft I, Wang X, Meng J, Ma J, Pires JC, King GJ,  
995 Brunel D, Delourme R, Renard M, Aury JM, Adams KL, Batley J, Snowdon RJ, Tost J, Edwards D,  
996 Zhou Y, Hua W, Sharpe AG, Paterson AH, Guan C, Wincker P** (2014) Plant genetics. Early  
997 allopolyploid evolution in the post-Neolithic Brassica napus oilseed genome. *Science* **345**: 950-  
998 953

- 999 **Chapman KD, Ohlrogge JB** (2012) Compartmentation of triacylglycerol accumulation in plants. The  
1000 Journal of biological chemistry **287**: 2288-2294
- 1001 **Cheng F, Wu J, Fang L, Wang X** (2012) Syntenic gene analysis between *Brassica rapa* and other  
1002 Brassicaceae species. Front Plant Sci **3**: 198
- 1003 **Cho MH, Lim H, Shin DH, Jeon JS, Bhoo SH, Park YI, Hahn TR** (2011) Role of the plastidic glucose  
1004 translocator in the export of starch degradation products from the chloroplasts in *Arabidopsis*  
1005 *thaliana*. New Phytol **190**: 101-112
- 1006 **Coordinators NR** (2018) Database resources of the National Center for Biotechnology Information.  
1007 Nucleic Acids Res **46**: D8-D13
- 1008 **Crooks GE, Hon G, Chandonia JM, Brenner SE** (2004) WebLogo: a sequence logo generator. Genome Res  
1009 **14**: 1188-1190
- 1010 **Dassanayake M, Oh DH, Haas JS, Hernandez A, Hong H, Ali S, Yun DJ, Bressan RA, Zhu JK, Bohnert HJ,**  
1011 **Cheeseman JM** (2011) The genome of the extremophile crucifer *Thellungiella parvula*. Nature  
1012 genetics **43**: 913-918
- 1013 **Dorn KM, Fankhauser JD, Wyse DL, Marks MD** (2013) De novo assembly of the pennycress (*Thlaspi*  
1014 *arvense*) transcriptome provides tools for the development of a winter cover crop and biodiesel  
1015 feedstock. The Plant journal : for cell and molecular biology **75**: 1028-1038
- 1016 **Eastmond PJ, Rawsthorne S** (1998) Comparison of the metabolic properties of plastids isolated from  
1017 developing leaves or embryos of *Brassica napus* L. Journal of Experimental Botany **49**: 1105-  
1018 1111
- 1019 **Eastmond PJ, Rawsthorne S** (2000) Coordinate changes in carbon partitioning and plastidial metabolism  
1020 during the development of oilseed rape embryos. Plant Physiology **122**: 767-774
- 1021 **Fabre N, Reiter IM, Becuwe-Linka N, Genty B, Rumeau D** (2007) Characterization and expression  
1022 analysis of genes encoding alpha and beta carbonic anhydrases in *Arabidopsis*. Plant Cell Environ  
1023 **30**: 617-629
- 1024 **Fatimi A, Boulard C, Bouyer D, Baud S, Dubreucq B, Lepiniec L** (2016) Deciphering and modifying LAFL  
1025 transcriptional regulatory network in seed for improving yield and quality of storage  
1026 compounds. Plant Sci **250**: 198-204
- 1027 **Focks N, Benning C** (1998) wrinkled1: A novel, low-seed-oil mutant of *Arabidopsis* with a deficiency in  
1028 the seed-specific regulation of carbohydrate metabolism. Plant Physiol **118**: 91-101
- 1029 **Franzke A, Lysak MA, Al-Shehbaz IA, Koch MA, Mummenhoff K** (2011) Cabbage family affairs: the  
1030 evolutionary history of Brassicaceae. Trends in plant science **16**: 108-116
- 1031 **Fukuda N, Ikawa Y, Aoyagi T, Kozaki A** (2013) Expression of the genes coding for plastidic acetyl-CoA  
1032 carboxylase subunits is regulated by a location-sensitive transcription factor binding site. Plant  
1033 Mol Biol **82**: 473-483
- 1034 **Gan X, Hay A, Kwantes M, Haberer G, Hallab A, Ioio RD, Hofhuis H, Pieper B, Cartolano M, Neumann U,**  
1035 **Nikolov LA, Song B, Hajheidari M, Briskine R, Kougioumoutzi E, Vlad D, Broholm S, Hein J,**  
1036 **Meksem K, Lightfoot D, Shimizu KK, Shimizu-Inatsugi R, Imprialou M, Kudrna D, Wing R, Sato**  
1037 **S, Huijser P, Filatov D, Mayer KF, Mott R, Tsiantis M** (2016) The Cardamine *hirsuta* genome  
1038 offers insight into the evolution of morphological diversity. Nat Plants **2**: 16167
- 1039 **Grimberg A, Carlsson AS, Marttila S, Bhalarao R, Hofvander P** (2015) Transcriptional transitions in  
1040 *Nicotiana benthamiana* leaves upon induction of oil synthesis by WRINKLED1 homologs from  
1041 diverse species and tissues. BMC Plant Biol **15**: 192
- 1042 **Haudry A, Platts AE, Vello E, Hoen DR, Leclercq M, Williamson RJ, Forczek E, Joly-Lopez Z, Steffen JG,**  
1043 **Hazzouri KM, Dewar K, Stinchcombe JR, Schoen DJ, Wang X, Schmutz J, Town CD, Edger PP,**  
1044 **Pires JC, Schumaker KS, Jarvis DE, Mandakova T, Lysak MA, van den Bergh E, Schranz ME,**  
1045 **Harrison PM, Moses AM, Bureau TE, Wright SI, Blanchette M** (2013) An atlas of over 90,000

- 1046 conserved noncoding sequences provides insight into crucifer regulatory regions. *Nat Genet* **45**:  
1047 891-898
- 1048 **Hay J, Shi H, Heinzl N, Hebbelmann I, Rolletschek H, Schwender J** (2014) Integration of a constraint-  
1049 based metabolic model of *Brassica napus* developing seeds with <sup>13</sup>C-Metabolic Flux Analysis.  
1050 *Frontiers in Plant Science* **5**:724
- 1051 **Hoang CV, Chapman KD** (2002) Biochemical and molecular inhibition of plastidial carbonic anhydrase  
1052 reduces the incorporation of acetate into lipids in cotton embryos and tobacco cell suspensions  
1053 and leaves. *Plant Physiol* **128**: 1417-1427
- 1054 **Holscher C, Lutterbey MC, Lansing H, Meyer T, Fischer K, von Schaewen A** (2016) Defects in  
1055 Peroxisomal 6-Phosphogluconate Dehydrogenase Isoform PGD2 Prevent Gametophytic  
1056 Interaction in *Arabidopsis thaliana*. *Plant Physiol* **171**: 192-205
- 1057 **Huang da W, Sherman BT, Lempicki RA** (2009) Systematic and integrative analysis of large gene lists  
1058 using DAVID bioinformatics resources. *Nat Protoc* **4**: 44-57
- 1059 **Jiao X, Sherman BT, Huang da W, Stephens R, Baseler MW, Lane HC, Lempicki RA** (2012) DAVID-WS: a  
1060 stateful web service to facilitate gene/protein list analysis. *Bioinformatics* **28**: 1805-1806
- 1061 **Johnson M, Zaretskaya I, Raytselis Y, Merezuk Y, McGinnis S, Madden TL** (2008) NCBI BLAST: a better  
1062 web interface. *Nucleic Acids Res* **36**: W5-9
- 1063 **Kagale S, Koh C, Nixon J, Bollina V, Clarke WE, Tuteja R, Spillane C, Robinson SJ, Links MG, Clarke C,  
1064 Higgins EE, Huebert T, Sharpe AG, Parkin IA** (2014) The emerging biofuel crop *Camelina sativa*  
1065 retains a highly undifferentiated hexaploid genome structure. *Nat Commun* **5**: 3706
- 1066 **Kagale S, Koh C, Nixon J, Bollina V, Clarke WE, Tuteja R, Spillane C, Robinson SJ, Links MG, Clarke C,  
1067 Higgins EE, Huebert T, Sharpe AG, Parkin IAP** (2014) The emerging biofuel crop *Camelina sativa*  
1068 retains a highly undifferentiated hexaploid genome structure. *Nat Commun* **5**
- 1069 **Kong Q, Ma W** (2018) WRINKLED1 transcription factor: How much do we know about its regulatory  
1070 mechanism? *Plant Sci* **272**: 153-156
- 1071 **Kong Q, Ma W, Yang H, Ma G, Mantyla JJ, Benning C** (2017) The *Arabidopsis* WRINKLED1 transcription  
1072 factor affects auxin homeostasis in roots. *J Exp Bot* **68**: 4627-4634
- 1073 **Kong Q, Yuan L, Ma W** (2019) WRINKLED1, a "Master Regulator" in Transcriptional Control of Plant Oil  
1074 Biosynthesis. *Plants (Basel)* **8**
- 1075 **Kruger NJ, von Schaewen A** (2003) The oxidative pentose phosphate pathway: structure and  
1076 organisation. *Current Opinion in Plant Biology* **6**: 236-246
- 1077 **Kubis SE, Pike MJ, Everett CJ, Hill LM, Rawsthorne S** (2004) The import of phosphoenolpyruvate by  
1078 plastids from developing embryos of oilseed rape, *Brassica napus* (L.), and its potential as a  
1079 substrate for fatty acid synthesis. *Journal of Experimental Botany* **55**: 1455-1462
- 1080 **Lamesch P, Berardini TZ, Li D, Swarbreck D, Wilks C, Sasidharan R, Muller R, Dreher K, Alexander DL,  
1081 Garcia-Hernandez M, Karthikeyan AS, Lee CH, Nelson WD, Ploetz L, Singh S, Wensel A, Huala E**  
1082 (2012) The *Arabidopsis* Information Resource (TAIR): improved gene annotation and new tools.  
1083 *Nucleic acids research* **40**: D1202-1210
- 1084 **Li-Beisson Y, Shorrosh B, Beisson F, Andersson MX, Arondel V, Bates PD, Baud S, Bird D, Debono A,  
1085 Durrett TP, Franke RB, Graham IA, Katayama K, Kelly AA, Larson T, Markham JE, Miquel M,  
1086 Molina I, Nishida I, Rowland O, Samuels L, Schmid KM, Wada H, Welti R, Xu C, Zallot R,  
1087 Ohlrogge J** (2013) Acyl-lipid metabolism. *The Arabidopsis book / American Society of Plant  
1088 Biologists* **11**: e0161
- 1089 **Li Q, Shao J, Tang S, Shen Q, Wang T, Chen W, Hong Y** (2015) Wrinkled1 Accelerates Flowering and  
1090 Regulates Lipid Homeostasis between Oil Accumulation and Membrane Lipid Anabolism in  
1091 *Brassica napus*. *Front Plant Sci* **6**: 1015

- 1092 **Liu H, Zhai Z, Kuczynski K, Keereetaweep J, Schwender J, Shanklin J** (2019) WRINKLED1 Regulates  
1093 BIOTIN ATTACHMENT DOMAIN-CONTAINING Proteins that Inhibit Fatty Acid Synthesis. *Plant*  
1094 *Physiol* **181**: 55-62
- 1095 **Louis A, Murat F, Salse J, Crollius HR** (2015) GenomicusPlants: a web resource to study genome  
1096 evolution in flowering plants. *Plant Cell Physiol* **56**: e4
- 1097 **Lu C, Xin Z, Ren Z, Miquel M, Browse J** (2009) An enzyme regulating triacylglycerol composition is  
1098 encoded by the ROD1 gene of Arabidopsis. *Proceedings of the National Academy of Sciences of*  
1099 *the United States of America* **106**: 18837-18842
- 1100 **Maeo K, Tokuda T, Ayame A, Mitsui N, Kawai T, Tsukagoshi H, Ishiguro S, Nakamura K** (2009) An AP2-  
1101 type transcription factor, WRINKLED1, of Arabidopsis thaliana binds to the AW-box sequence  
1102 conserved among proximal upstream regions of genes involved in fatty acid synthesis. *The Plant*  
1103 *journal* **60**: 476-487
- 1104 **Masaki T, Mitsui N, Tsukagoshi H, Nishii T, Morikami A, Nakamura K** (2005) ACTIVATOR of  
1105 Spomin::LUC1/WRINKLED1 of *Arabidopsis thaliana* transactivates sugar-inducible promoters.  
1106 *Plant Cell Physiol* **46**: 547-556
- 1107 **McGlew K, Shaw V, Zhang M, Kim RJ, Yang W, Shorrosh B, Suh MC, Ohlrogge J** (2014) An annotated  
1108 database of Arabidopsis mutants of acyl lipid metabolism. *Plant Cell Rep*
- 1109 **Mendes A, Kelly AA, van Erp H, Shaw E, Powers SJ, Kurup S, Eastmond PJ** (2013) bZIP67 regulates the  
1110 omega-3 fatty acid content of Arabidopsis seed oil by activating fatty acid desaturase3. *Plant Cell*  
1111 **25**: 3104-3116
- 1112 **Mustroph A, Stock J, Hess N, Aldous S, Dreilich A, Grimm B** (2013) Characterization of the  
1113 phosphofructokinase gene family in rice and its expression under oxygen deficiency stress. *Front*  
1114 *Plant Sci* **4**: 125
- 1115 **Neuhaus HE, Emes MJ** (2000) Nonphotosynthetic Metabolism in Plastids. *Annual review of plant*  
1116 *physiology and plant molecular biology* **51**: 111-140
- 1117 **Niewiadomski P, Knappe S, Geimer S, Fischer K, Schulz B, Unte US, Rosso MG, Ache P, Flugge UI,**  
1118 **Schneider A** (2005) The Arabidopsis plastidic glucose 6-phosphate/phosphate translocator GPT1  
1119 is essential for pollen maturation and embryo sac development. *Plant Cell* **17**: 760-775
- 1120 **O'Grady J, Schwender J, Shachar-Hill Y, Morgan JA** (2012) Metabolic cartography: experimental  
1121 quantification of metabolic fluxes from isotopic labelling studies. *Journal of experimental botany*  
1122 **63**: 2293-2308
- 1123 **Olson CL** (1987) *Statistics: Making Sense of Data*. Wm. C. Brown Publishers, Dubuque, IA
- 1124 **Park CS, Go YS, Suh MC** (2016) Cuticular wax biosynthesis is positively regulated by WRINKLED4, an  
1125 AP2/ERF-type transcription factor, in Arabidopsis stems. *Plant J* **88**: 257-270
- 1126 **Rawat V, Abdelsamad A, Pietzenek B, Seymour DK, Koenig D, Weigel D, Pecinka A, Schneeberger K**  
1127 (2015) Improving the Annotation of Arabidopsis lyrata Using RNA-Seq Data. *PLoS One* **10**:  
1128 e0137391
- 1129 **Rawsthorne S** (2002) Carbon flux and fatty acid synthesis in plants. *Prog Lipid Res* **41**: 182-196
- 1130 **Rhee SY, Beavis W, Berardini TZ, Chen G, Dixon D, Doyle A, Garcia-Hernandez M, Huala E, Lander G,**  
1131 **Montoya M, Miller N, Mueller LA, Mundodi S, Reiser L, Tacklind J, Weems DC, Wu Y, Xu I, Yoo**  
1132 **D, Yoon J, Zhang P** (2003) The Arabidopsis Information Resource (TAIR): a model organism  
1133 database providing a centralized, curated gateway to Arabidopsis biology, research materials  
1134 and community. *Nucleic Acids Res* **31**: 224-228
- 1135 **Riggs JW, Cavales PC, Chapiro SM, Callis J** (2017) Identification and biochemical characterization of the  
1136 fructokinase gene family in Arabidopsis thaliana. *BMC Plant Biol* **17**: 83
- 1137 **Ruuska SA, Girke T, Benning C, Ohlrogge JB** (2002) Contrapuntal networks of gene expression during  
1138 *Arabidopsis* seed filling. *Plant Cell* **14**: 1191-1206



- 1139 **Schmid M, Davison TS, Henz SR, Pape UJ, Demar M, Vingron M, Schölkopf B, Weigel D, Lohmann JU**  
1140 (2005) A gene expression map of *Arabidopsis thaliana* development. *Nature Genetics* **37**: 501-  
1141 506
- 1142 **Schwender J, Hebbelmann I, Heinzl N, Hildebrandt T, Rogers A, Naik D, Klapperstuck M, Braun HP,**  
1143 **Schreiber F, Denolf P, Borisjuk L, Rolletschek H** (2015) Quantitative Multilevel Analysis of  
1144 Central Metabolism in Developing Oilseeds of Oilseed Rape during in Vitro Culture. *Plant Physiol*  
1145 **168**: 828-848
- 1146 **Seidel SA, Dijkman PM, Lea WA, van den Bogaart G, Jerabek-Willemsen M, Lazic A, Joseph JS,**  
1147 **Srinivasan P, Baaske P, Simeonov A, Katritch I, Melo FA, Ladbury JE, Schreiber G, Watts A,**  
1148 **Braun D, Duhr S** (2013) Microscale thermophoresis quantifies biomolecular interactions under  
1149 previously challenging conditions. *Methods* **59**: 301-315
- 1150 **Shen W, Wei Y, Dauk M, Tan Y, Taylor DC, Selvaraj G, Zou J** (2006) Involvement of a glycerol-3-  
1151 phosphate dehydrogenase in modulating the NADH/NAD<sup>+</sup> ratio provides evidence of a  
1152 mitochondrial glycerol-3-phosphate shuttle in *Arabidopsis*. *Plant Cell* **18**: 422-441
- 1153 **Slotte T, Hazzouri KM, Agren JA, Koenig D, Maumus F, Guo YL, Steige K, Platts AE, Escobar JS, Newman**  
1154 **LK, Wang W, Mandakova T, Vello E, Smith LM, Henz SR, Steffen J, Takuno S, Brandvain Y, Coop**  
1155 **G, Andolfatto P, Hu TT, Blanchette M, Clark RM, Quesneville H, Nordborg M, Gaut BS, Lysak**  
1156 **MA, Jenkins J, Grimwood J, Chapman J, Prochnik S, Shu S, Rokhsar D, Schmutz J, Weigel D,**  
1157 **Wright SI** (2013) The *Capsella rubella* genome and the genomic consequences of rapid mating  
1158 system evolution. *Nature genetics* **45**: 831-835
- 1159 **Stein O, Avin-Wittenberg T, Krahnert I, Zemach H, Bogol V, Daron O, Aloni R, Fernie AR, Granot D**  
1160 (2016) *Arabidopsis* Fructokinases Are Important for Seed Oil Accumulation and Vascular  
1161 Development. *Front Plant Sci* **7**: 2047
- 1162 **Stothard P** (2000) The sequence manipulation suite: JavaScript programs for analyzing and formatting  
1163 protein and DNA sequences. *Biotechniques* **28**: 1102, 1104
- 1164 **To A, Joubes J, Barthole G, Lecureuil A, Scagnelli A, Jasinski S, Lepiniec L, Baud S** (2012) WRINKLED  
1165 transcription factors orchestrate tissue-specific regulation of fatty acid biosynthesis in  
1166 *Arabidopsis*. *Plant Cell* **24**: 5007-5023
- 1167 **Trapnell C, Williams BA, Pertea G, Mortazavi A, Kwan G, van Baren MJ, Salzberg SL, Wold BJ, Pachter L**  
1168 (2010) Transcript assembly and quantification by RNA-Seq reveals unannotated transcripts and  
1169 isoform switching during cell differentiation. *Nature Biotechnology* **28**: 511-515
- 1170 **Troncoso-Ponce MA, Kilaru A, Cao X, Durrett TP, Fan J, Jensen JK, Thrower NA, Pauly M, Wilkerson C,**  
1171 **Ohlrogge JB** (2011) Comparative deep transcriptional profiling of four developing oilseeds. *The*  
1172 *Plant journal* **68**: 1014-1027
- 1173 **Usadel B, Poree F, Nagel A, Lohse M, Czedik-Eysenberg A, Stitt M** (2009) A guide to using MapMan to  
1174 visualize and compare Omics data in plants: a case study in the crop species, Maize. *Plant, cell &*  
1175 *environment* **32**: 1211-1229
- 1176 **VILLESEN P** (2007) FaBox: an online toolbox for fasta sequences. *Molecular Ecology Notes* **7**: 965-968
- 1177 **Weber A, Servaites JC, Geiger DR, Kofler H, Hille D, Groner F, Hebbeker U, Flugge UI** (2000)  
1178 Identification, purification, and molecular cloning of a putative plastidic glucose translocator.  
1179 *Plant Cell* **12**: 787-802
- 1180 **Wei Y, Periappuram C, Datla R, Selvaraj G, Zou J** (2001) Molecular and biochemical characterizations of  
1181 a plastidic glycerol-3-phosphate dehydrogenase from *Arabidopsis*§1This is National Research  
1182 Council of Canada publication No. 43805. EMBL accession number for the *Arabidopsis* plastidic  
1183 glycerol-3-phosphate dehydrogenase: AJ242602. *Plant Physiology and Biochemistry* **39**: 841-848
- 1184 **White JA, Todd J, Newman T, Focks N, Girke T, de Ilarduya OM, Jaworski JG, Ohlrogge JB, Benning C**  
1185 (2000) A new set of *Arabidopsis* expressed sequence tags from developing seeds. The metabolic  
1186 pathway from carbohydrates to seed oil. *Plant Physiol* **124**: 1582-1594

- 1187 **Workman CT, Yin Y, Corcoran DL, Ideker T, Stormo GD, Benos PV** (2005) enoLOGOS: a versatile web  
1188 tool for energy normalized sequence logos. *Nucleic Acids Res* **33**: W389-392
- 1189 **Yamamoto A, Kagaya Y, Toyoshima R, Kagaya M, Takeda S, Hattori T** (2009) Arabidopsis NF-YB subunits  
1190 LEC1 and LEC1-LIKE activate transcription by interacting with seed-specific ABRE-binding factors.  
1191 *Plant J* **58**: 843-856
- 1192 **Yang R, Jarvis DE, Chen H, Beilstein MA, Grimwood J, Jenkins J, Shu S, Prochnik S, Xin M, Ma C,**  
1193 **Schmutz J, Wing RA, Mitchell-Olds T, Schumaker KS, Wang X** (2013) The Reference Genome of  
1194 the Halophytic Plant *Eutrema salsugineum*. *Frontiers in Plant Science* **4**: 46
- 1195 **Yu CP, Lin JJ, Li WH** (2016) Positional distribution of transcription factor binding sites in *Arabidopsis*  
1196 *thaliana*. *Sci Rep* **6**: 25164
- 1197 **Zhang J, Tian Y, Yan L, Zhang G, Wang X, Zeng Y, Zhang J, Ma X, Tan Y, Long N, Wang Y, Ma Y, He Y, Xue**  
1198 **Y, Hao S, Yang S, Wang W, Zhang L, Dong Y, Chen W, Sheng J** (2016) Genome of Plant Maca  
1199 (*Lepidium meyenii*) Illuminates Genomic Basis for High-Altitude Adaptation in the Central Andes.  
1200 *Mol Plant* **9**: 1066-1077
- 1201 **Zhou XR, Shrestha P, Yin F, Petrie JR, Singh SP** (2013) AtDGAT2 is a functional acyl-CoA:diacylglycerol  
1202 acyltransferase and displays different acyl-CoA substrate preferences than AtDGAT1. *FEBS Lett*  
1203 **587**: 2371-2376
- 1204
